# Supplementary material for: Discovery of Arabidopsis UGT73C1 as a steviol-catalyzing UDP-glycosyltransferase with chemical probes
Source: Royal Society of Chemistry journal article supplement (doi:10.1039/c7cc09951g), 2018-01-01
Supplement: c7cc09951g1.xlsx [file c7cc09951g1.xlsx]

## Sheet: Table S1
Supplementary Table S1. Proteins identified from the pull-down/LC-MS experiments.
Accession	Description	Enrichment ratio		Normalized ratio		-log(p-value)	log2(ratio)	Competition ratio		Normalized ratio		-log(p-value)	log2(ratio)
		Replicate 1	Replicate 2	Replicate 1	Replicate 2			Replicate 1	Replicate 2	Replicate 1	Replicate 2
F4IMB5	ATPase, F1 complex, alpha subunit protein GN=At2g07698 PE=3 SV=1	10.727	12.6	4.34489	4.91247	1.40913	4.62868	3.75	3.806	5.06286	4.87715	1.92472	4.97001
Q9FX54	Glyceraldehyde-3-phosphate dehydrogenase GAPC2, cytosolic GN=GAPC2 PE=1 SV=1	8.95	10.033	3.01229	3.22859	1.65647	3.12044	3.734	3.599	5.01748	4.31762	1.32204	4.66755
Q85B88	Ribulose 1,5-bisphosphate carboxylase/oxygenase large chain (Fragment) GN=RBCL PE=3 SV=1	6.313	5.483	1.03475	0.243929	0.452698	0.639339	3.031	3.106	3.02342	2.98502	2.39066	3.00422
F4JWF6	DEAD-box ATP-dependent RNA helicase 56 GN=At5g11200 PE=4 SV=1	4.406	7.113	-0.395348	1.31316	0.163569	0.458906	3.042	3.025	3.05462	2.76608	1.50125	2.91035
P0DH99	Elongation factor 1-alpha 1 GN=A1 PE=1 SV=1	5.359	5.413	0.319325	0.198011	0.833759	0.258668	2.708	2.855	2.10722	2.30656	1.54164	2.20689
Q9ZU52	Probable fructose-bisphosphate aldolase 3, chloroplastic GN=FBA3 PE=1 SV=1	5.926	5.505	0.74453	0.258361	0.54157	0.501445	2.68	2.835	2.0278	2.2525	1.47639	2.14015
P31167	ADP,ATP carrier protein 1, mitochondrial GN=AAC1 PE=1 SV=2	7.804	8.303	2.15288	2.09377	2.05251	2.12332	2.536	2.924	1.61934	2.49307	0.875252	2.05621
F4K6B6	Heat shock protein 81-2 GN=HSP81-2 PE=1 SV=1	6.007	6.364	0.805273	0.821839	2.18834	0.813556	2.661	2.749	1.97391	2.02004	2.13355	1.99697
Q5GM68	Phosphoenolpyruvate carboxylase 2 GN=PPC2 PE=1 SV=2	4.461	4.252	-0.354103	-0.56357	0.845068	-0.458836	2.539	2.862	1.62785	2.32548	0.953908	1.97667
Q9CA90	Glyoxylate/hydroxypyruvate reductase A HPR2 GN=HPR2 PE=1 SV=1	4.257	3.493	-0.507086	-1.06145	0.664992	-0.784269	2.6	2.725	1.80088	1.95517	1.58277	1.87802
Q9SIH0	40S ribosomal protein S14-1 GN=RPS14A PE=1 SV=1	5.171	5.814	0.17834	0.461055	0.576698	0.319698	2.618	2.647	1.85194	1.74433	1.72025	1.79813
Q9ZUX0	At2g27680/F15K20.22 GN=At2g27680 PE=2 SV=1	4.153	5.675	-0.585078	0.369876	0.0660612	-0.107601	2.581	2.674	1.74699	1.81731	1.90105	1.78215
P32961	Nitrilase 1 GN=NIT1 PE=1 SV=2	5.867	5.764	0.700284	0.428257	0.822231	0.564271	2.557	2.663	1.67891	1.78758	1.70006	1.73324
Q00218	Phospho-2-dehydro-3-deoxyheptonate aldolase 2, chloroplastic GN=DHS2 PE=2 SV=2	5.106	5.731	0.129596	0.40661	0.517734	0.268103	2.772	2.401	2.28876	1.07938	0.658644	1.68407
O80840	Phosphomannomutase GN=PMM PE=1 SV=1	6.431	7.385	1.12324	1.49158	1.05015	1.30741	2.348	2.791	1.08608	2.13357	0.698443	1.60982
Q9S850	Sulfite oxidase GN=SOX PE=1 SV=1	5.742	5.996	0.606544	0.580442	1.85395	0.593493	2.596	2.528	1.78954	1.42267	1.14029	1.6061
Q9M5K3	Dihydrolipoyl dehydrogenase 1, mitochondrial GN=LPD1 PE=1 SV=2	6.207	6.892	0.955257	1.16819	1.19636	1.06172	2.523	2.602	1.58247	1.62269	2.09754	1.60258
Q93VR4	MLP-like protein 423 GN=MLP423 PE=2 SV=1	9.794	11	3.64522	3.86292	1.73392	3.75407	2.335	2.784	1.04921	2.11465	0.68447	1.58193
P31414	Pyrophosphate-energized vacuolar membrane proton pump 1 GN=AVP1 PE=1 SV=1	6.271	6.993	1.00325	1.23444	1.18349	1.11885	2.502	2.596	1.5229	1.60647	1.76963	1.56469
Q9ZPI1	Lysine--tRNA ligase, cytoplasmic GN=At3g11710 PE=1 SV=1	4.643	4.546	-0.217617	-0.370715	0.7903	-0.294166	2.175	2.929	0.595365	2.50659	0.454024	1.55098
P0CZ23	Acyl-coenzyme A oxidase 3, peroxisomal GN=ACX3 PE=1 SV=1	6.247	8.36	0.985254	2.13116	0.64914	1.5582	2.386	2.674	1.19387	1.81731	0.886153	1.50559
P51419	60S ribosomal protein L27-3 GN=RPL27C PE=2 SV=2	5.667	4.668	0.5503	-0.290687	0.0918459	0.129807	2.39	2.669	1.20521	1.8038	0.903054	1.50451
Q9SJU4	Probable fructose-bisphosphate aldolase 1, chloroplastic GN=FBA1 PE=1 SV=2	4.577	6.783	-0.267112	1.09669	0.185689	0.414789	2.807	2.211	2.38804	0.565802	0.453586	1.47692
B9DHH1	Nucleoside diphosphate kinase GN=At4g11010 PE=2 SV=1	3.619	4.536	-0.985535	-0.377275	0.573082	-0.681405	2.614	2.374	1.84059	1.0064	0.741228	1.4235
Q38950	Serine/threonine-protein phosphatase 2A 65 kDa regulatory subunit A beta isoform GN=PP2AA2 PE=1 SV=2	10.963	11.735	4.52187	4.34506	1.89642	4.43347	2.433	2.552	1.32718	1.48754	1.44094	1.40736
Q8L7B5	Chaperonin CPN60-like 1, mitochondrial GN=At2g33210 PE=2 SV=1	5.938	6.688	0.753529	1.03437	1.00353	0.893951	2.444	2.515	1.35839	1.38753	2.17032	1.37296
Q9SJL8	S-adenosylmethionine synthase 3 GN=METK3 PE=1 SV=1	6.23	6.413	0.972505	0.853982	1.38454	0.913243	2.407	2.537	1.25344	1.44699	1.34148	1.35021
P42645	14-3-3-like protein GF14 upsilon GN=GRF5 PE=1 SV=2	4.612	4.455	-0.240865	-0.430408	0.756472	-0.335637	2.539	2.391	1.62785	1.05235	0.870784	1.3401
Q9LF98	Fructose-bisphosphate aldolase GN=F8J2_100 PE=1 SV=1	4.691	4.257	-0.181621	-0.56029	0.522242	-0.370956	2.439	2.49	1.3442	1.31995	2.23694	1.33208
Q9ZUC1	Quinone oxidoreductase-like protein At1g23740, chloroplastic GN=At1g23740 PE=2 SV=2	3.814	4.353	-0.839301	-0.497317	0.79734	-0.668309	2.443	2.437	1.35555	1.17669	1.34783	1.26612
Q9XFT3	Oxygen-evolving enhancer protein 3-1, chloroplastic GN=PSBQ1 PE=1 SV=3	4.13	3.713	-0.602326	-0.917138	0.88586	-0.759732	2.295	2.586	0.935747	1.57944	0.797233	1.25759
Q9FZA2	Non-classical arabinogalactan protein 31 GN=AGP31 PE=1 SV=1	4.865	4.894	-0.0511352	-0.142437	0.55195	-0.0967863	2.417	2.449	1.2818	1.20913	1.73122	1.24546
Q0WUH6	Catalase GN=At1g20630 PE=2 SV=1	5.444	4.473	0.383068	-0.418601	0.0124225	-0.0177663	2.121	2.756	0.442194	2.03896	0.438851	1.24058
P29513	Tubulin beta-5 chain GN=TUBB5 PE=2 SV=1	8.345	4.493	2.55859	-0.405481	0.221806	1.07655	2.366	2.494	1.13714	1.33076	1.30238	1.23395
Q8L934	Nucleoid DNA-binding-like protein PE=2 SV=1	4.472	4.437	-0.345853	-0.442216	1.11093	-0.394035	2.433	2.414	1.32718	1.11452	1.25721	1.22085
Q38893	Zeta-carotene desaturase, chloroplastic/chromoplastic GN=ZDS1 PE=1 SV=3	5.648	6.019	0.536052	0.595529	1.47585	0.565791	2.414	2.377	1.27329	1.01451	1.14444	1.1439
O65258	Beta-amylase 2, chloroplastic GN=BAM2 PE=1 SV=2	5.644	3.904	0.533052	-0.791848	0.0569043	-0.129398	2.526	2.259	1.59098	0.695548	0.624115	1.14326
Q9SIF2	Heat shock protein 90-5, chloroplastic GN=HSP90-5 PE=1 SV=1	4.586	6.101	-0.260363	0.649319	0.129143	0.194478	2.148	2.652	0.51878	1.75784	0.498523	1.13831
Q9ZQ99	UDP-glycosyltransferase 73C1 GN=UGT73C1 PE=2 SV=1	6.658	7.255	1.29347	1.40631	1.57525	1.34989	2.347	2.443	1.08324	1.19291	1.51359	1.13808
Q9LZG0	Adenosine kinase 2 GN=ADK2 PE=1 SV=1	4.348	4.667	-0.438843	-0.291343	0.896565	-0.365093	2.478	2.281	1.45483	0.755015	0.709423	1.10492
Q39258	V-type proton ATPase subunit E1 GN=VHA-E1 PE=1 SV=2	4.755	3.83	-0.133626	-0.84039	0.398359	-0.487008	2.21	2.54	0.694643	1.4551	0.664633	1.07487
Q93VG5	40S ribosomal protein S8-1 GN=RPS8A PE=2 SV=1	7.976	8.745	2.28186	2.3837	1.85718	2.33278	2.218	2.513	0.717335	1.38212	0.709465	1.04973
P93736	Valine--tRNA ligase, mitochondrial 1 GN=TWN2 PE=2 SV=2	5.596	5.246	0.497056	0.0884641	0.411313	0.29276	2.384	2.333	1.1882	0.895573	1.05149	1.04188
O22769	NADH dehydrogenase [ubiquinone] flavoprotein 2, mitochondrial GN=At4g02580 PE=2 SV=3	4.959	4.391	0.0193575	-0.472391	0.278954	-0.226517	2.191	2.487	0.64075	1.31184	0.676233	0.976296
Q9SZD6	Elongation factor Ts GN=F19B15.90 PE=2 SV=1	6.21	6.869	0.957507	1.1531	1.2304	1.05531	2.159	2.511	0.549981	1.37671	0.588308	0.963348
Q9FK25	Flavone 3'-O-methyltransferase 1 GN=OMT1 PE=1 SV=1	4.077	4.242	-0.642072	-0.57013	1.42322	-0.606101	2.262	2.397	0.842142	1.06857	1.12441	0.955355
Q9FLG1	Beta-D-xylosidase 4 GN=BXL4 PE=1 SV=1	2.704	4.624	-1.67171	-0.319549	0.420491	-0.99563	2.369	2.269	1.14565	0.722579	0.848402	0.934113
Q9FWA3	6-phosphogluconate dehydrogenase, decarboxylating 3 GN=At3g02360 PE=2 SV=1	6.36	6.764	1.06999	1.08423	2.37614	1.07711	2.519	2.108	1.57112	0.287389	0.414739	0.929257
P82281	Thylakoid lumenal 29 kDa protein, chloroplastic GN=TL29 PE=1 SV=2	4.63	4.587	-0.227366	-0.34382	0.892654	-0.285593	2.308	2.329	0.972621	0.884761	1.52155	0.928691
Q9LK36	Adenosylhomocysteinase 2 GN=SAHH2 PE=1 SV=1	5.045	5.386	0.0838505	0.1803	0.65194	0.132075	2.276	2.361	0.881853	0.971259	1.51299	0.926556
Q9LIA8	UDP-glucose 6-dehydrogenase 2 GN=UGD2 PE=1 SV=1	5.116	5.214	0.137095	0.0674733	0.680195	0.102284	2.278	2.335	0.887526	0.900979	2.31979	0.894253
P10796	Ribulose bisphosphate carboxylase small chain 1B, chloroplastic GN=RBCS-1B PE=2 SV=1	5.844	6.41	0.683036	0.852014	1.15616	0.767525	2.39	2.216	1.20521	0.579318	0.668066	0.892266
P24636	Tubulin beta-4 chain GN=TUBB4 PE=2 SV=2	5.262	5.242	0.246583	0.0858404	0.542522	0.166212	2.274	2.328	0.87618	0.882058	2.67192	0.879119
Q42406	Peptidyl-prolyl cis-trans isomerase CYP18-4 GN=CYP18-4 PE=1 SV=1	3.696	3.748	-0.927791	-0.894179	1.93022	-0.910985	2.352	2.242	1.09743	0.649597	0.796557	0.873512
Q949P2	Probable cytosolic oligopeptidase A GN=CYOP PE=1 SV=1	4.131	5.189	-0.601576	0.051074	0.256553	-0.275251	2.21	2.381	0.694643	1.02532	0.917503	0.859981
Q9LRX8	60S ribosomal protein L13a-2 GN=RPL13AB PE=2 SV=1	4.845	7.08	-0.0661336	1.29151	0.273623	0.61269	2.4	2.18	1.23358	0.482008	0.580274	0.857794
O24456	Receptor for activated C kinase 1A GN=RACK1A PE=1 SV=2	3.696	3.828	-0.927791	-0.841702	1.50936	-0.884746	2.246	2.335	0.796758	0.900979	1.40858	0.848869
P56761	Photosystem II D2 protein GN=psbD PE=1 SV=3	5.286	6.435	0.264581	0.868413	0.506225	0.566497	2.361	2.203	1.12296	0.544178	0.672177	0.833567
Q96255	Phosphoserine aminotransferase 1, chloroplastic GN=PSAT1 PE=1 SV=1	5.272	5.947	0.254082	0.548299	0.650248	0.401191	2.286	2.276	0.910218	0.7415	1.1884	0.825859
F4I7I0	Alanine aminotransferase 1, mitochondrial GN=ALAAT1 PE=1 SV=1	4.034	4.26	-0.674318	-0.558322	1.22379	-0.61632	2.305	2.247	0.964112	0.663112	0.933882	0.813612
Q96533	Alcohol dehydrogenase class-3 GN=ADH2 PE=1 SV=2	2.903	3.467	-1.52248	-1.07851	0.968069	-1.30049	2.208	2.346	0.68897	0.930713	1.02539	0.809841
B2LU29	Sulfotransferase GN=SOT18 PE=3 SV=1	4.977	4.323	0.0328561	-0.516996	0.267281	-0.24207	2.332	2.215	1.0407	0.576614	0.749832	0.808656
Q9LRS0	Peroxisomal (S)-2-hydroxy-acid oxidase GLO2 GN=GLO2 PE=1 SV=1	3.769	3.916	-0.873047	-0.783976	1.46613	-0.828512	2.242	2.308	0.785412	0.827998	1.7747	0.806705
Q42340	40S ribosomal protein S16-3 GN=RPS16C PE=2 SV=1	3.95	4.058	-0.737311	-0.690829	1.68375	-0.71407	2.425	2.114	1.30449	0.303607	0.450476	0.80405
O65202	Peroxisomal acyl-coenzyme A oxidase 1 GN=ACX1 PE=1 SV=1	5.53	5.219	0.447562	0.0707529	0.397738	0.259157	2.129	2.416	0.464886	1.11993	0.602902	0.792406
Q680K2	Haloacid dehalogenase-like hydrolase domain-containing protein At4g39970 GN=At4g39970 PE=2 SV=1	5.861	4.772	0.695785	-0.222466	0.156761	0.23666	2.117	2.419	0.430848	1.12803	0.5723	0.779442
Q9SCX3	Elongation factor 1-beta 2 GN=At5g19510 PE=1 SV=1	6.431	6.946	1.12324	1.20361	1.65794	1.16343	2.32	2.184	1.00666	0.49282	0.677425	0.74974
P25819	Catalase-2 GN=CAT2 PE=2 SV=3	5.156	4.543	0.167092	-0.372683	0.114457	-0.102796	2.358	2.14	1.11445	0.373886	0.531753	0.744167
Q9CAI7	Eukaryotic initiation factor 4A-3 GN=TIF4A-3 PE=1 SV=1	5.509	5.743	0.431813	0.414481	1.88486	0.423147	2.235	2.264	0.765556	0.709063	1.61302	0.737309
Q0WUS4	Malate dehydrogenase GN=At2g22780 PE=2 SV=1	6.037	4.365	0.827771	-0.489446	0.0757491	0.169163	2.089	2.415	0.351426	1.11722	0.514296	0.734324
Q43127	Glutamine synthetase, chloroplastic/mitochondrial GN=GLN2 PE=1 SV=1	4.284	4.944	-0.486838	-0.109639	0.444927	-0.298239	2.266	2.226	0.853488	0.606348	0.97158	0.729918
P54609	Cell division control protein 48 homolog A GN=CDC48A PE=1 SV=1	5.962	5.803	0.771527	0.45384	0.791844	0.612683	2.309	2.171	0.975458	0.457681	0.656171	0.716569
Q41932	Oxygen-evolving enhancer protein 3-2, chloroplastic GN=PSBQ2 PE=1 SV=2	4.9	4.776	-0.0248878	-0.219842	0.368318	-0.122365	2.206	2.276	0.683298	0.7415	1.58517	0.712399
P56757	ATP synthase subunit alpha, chloroplastic GN=atpA PE=1 SV=1	4.237	5.362	-0.522085	0.164557	0.158401	-0.178764	2.401	2.066	1.23642	0.173861	0.386091	0.705139
Q94JQ3	Serine hydroxymethyltransferase 3, chloroplastic GN=SHM3 PE=1 SV=2	6.291	5.367	1.01825	0.167837	0.402303	0.593043	2.317	2.154	0.998149	0.411729	0.600437	0.704939
Q8RWV0	Transketolase-1, chloroplastic GN=TKL-1 PE=1 SV=1	4.863	5.28	-0.0526349	0.110767	0.106569	0.0290662	2.262	2.209	0.842142	0.560396	0.89892	0.701269
P51418	60S ribosomal protein L18a-2 GN=RPL18AB PE=2 SV=2	5.78	5.173	0.635042	0.0405783	0.337832	0.33781	2.227	2.239	0.742864	0.641488	1.3322	0.692176
P42733	40S ribosomal protein S11-3 GN=RPS11C PE=2 SV=2	6.178	6.873	0.933509	1.15573	1.17096	1.04462	2.335	2.122	1.04921	0.325231	0.510546	0.687219
O49299	Probable phosphoglucomutase, cytoplasmic 1 GN=At1g23190 PE=2 SV=2	5.535	6.954	0.451311	1.20886	0.564587	0.830086	2.254	2.2	0.819449	0.536069	0.882065	0.677759
Q08682	40S ribosomal protein Sa-1 GN=RPSaA PE=1 SV=3	3.992	3.527	-0.705815	-1.03915	0.920228	-0.872482	2.155	2.301	0.538635	0.809076	0.899374	0.673856
Q9SF85	Adenosine kinase 1 GN=ADK1 PE=1 SV=1	4.567	4.72	-0.274611	-0.256576	1.66542	-0.265594	2.182	2.255	0.615221	0.684736	1.46838	0.649979
Q94B78	Glycine dehydrogenase (decarboxylating) 1, mitochondrial GN=GLDP1 PE=1 SV=2	4.364	4.453	-0.426845	-0.43172	2.44189	-0.429283	2.177	2.259	0.601039	0.695548	1.33421	0.648294
Q9SFH9	Delta-aminolevulinic acid dehydratase 1, chloroplastic GN=HEMB1 PE=2 SV=1	7.487	5.968	1.91515	0.562075	0.497214	1.23861	1.964	2.474	-0.00313749	1.2767	0.299673	0.636782
F4KGV5	14-3-3-like protein GF14 lambda GN=GRF6 PE=3 SV=1	4.216	4.405	-0.537833	-0.463207	1.32448	-0.50052	2.166	2.26	0.569837	0.698251	1.19213	0.634044
Q9SIP7	40S ribosomal protein S3-1 GN=RPS3A PE=1 SV=1	4.01	4.19	-0.692316	-0.60424	1.36472	-0.648278	2.144	2.283	0.507434	0.760421	0.901758	0.633928
Q8RUW5	Serine carboxypeptidase-like 8 GN=SCPL8 PE=1 SV=2	4.91	5.24	-0.0173888	0.0845282	0.201238	0.0335697	2.435	1.977	1.33286	-0.0667096	0.274222	0.633074
Q93ZA7	Malate dehydrogenase PE=2 SV=1	4.748	4.525	-0.138876	-0.38449	0.553867	-0.261683	2.261	2.156	0.839305	0.417135	0.685369	0.62822
Q8LEZ6	Adenylosuccinate synthetase, chloroplastic GN=PURA PE=2 SV=1	3.693	3.981	-0.930041	-0.741338	1.14525	-0.83569	2.4	2.01	1.23358	0.0224907	0.311229	0.628035
Q9LKJ1	3-hydroxyisobutyryl-CoA hydrolase 1 GN=CHY1 PE=1 SV=1	8.216	10.412	2.46185	3.47721	0.967395	2.96953	2.149	2.272	0.521616	0.730688	0.977521	0.626152
P16181	40S ribosomal protein S11-1 GN=RPS11A PE=2 SV=1	4.858	4.401	-0.0563846	-0.465831	0.373335	-0.261108	2.123	2.296	0.447867	0.795561	0.760497	0.621714
P33207	3-oxoacyl-[acyl-carrier-protein] reductase, chloroplastic GN=At1g24360 PE=1 SV=2	5.06	5.534	0.0950992	0.277384	0.538001	0.186241	2.162	2.251	0.558491	0.673924	1.22581	0.616207
Q9LYA9	Chloroplast stem-loop binding protein of 41 kDa a, chloroplastic GN=CSP41A PE=1 SV=1	4.008	3.92	-0.693816	-0.781352	1.42328	-0.737584	2.158	2.252	0.547145	0.676627	1.17322	0.611886
Q949U7	Peroxiredoxin-2E, chloroplastic GN=PRXIIE PE=1 SV=2	4.073	4.993	-0.645071	-0.0774963	0.372753	-0.361284	2.116	2.292	0.428011	0.784749	0.739626	0.60638
Q9LYR4	Aldolase-type TIM barrel family protein GN=T22N19_70 PE=2 SV=1	6.968	7.785	1.52595	1.75397	1.35469	1.63996	2.044	2.356	0.223783	0.957743	0.451155	0.590763
Q9M1R2	Proline--tRNA ligase, cytoplasmic GN=At3g62120 PE=2 SV=1	4.707	4.445	-0.169622	-0.436968	0.577944	-0.303295	2.203	2.187	0.674788	0.500929	1.02936	0.587859
O50008	5-methyltetrahydropteroyltriglutamate--homocysteine methyltransferase 1 GN=MS1 PE=1 SV=1	4.458	4.447	-0.356352	-0.435656	1.197	-0.396004	2.196	2.193	0.654932	0.517148	1.12786	0.58604
Q9M084	Aspartate--tRNA ligase 2, cytoplasmic GN=IBI1 PE=1 SV=1	5.282	4.481	0.261581	-0.413353	0.0659126	-0.0758858	2.046	2.35	0.229456	0.941525	0.458648	0.58549
P55228	Glucose-1-phosphate adenylyltransferase small subunit, chloroplastic GN=APS1 PE=2 SV=2	6.713	7.384	1.33472	1.49093	1.45396	1.41282	2.075	2.31	0.311715	0.833403	0.565203	0.572559
Q56WD9	3-ketoacyl-CoA thiolase 2, peroxisomal GN=PED1 PE=1 SV=2	5.341	6.083	0.305827	0.637511	0.667067	0.471669	2.418	1.948	1.28464	-0.145098	0.242906	0.569769
Q9SE60	Methylenetetrahydrofolate reductase 1 GN=MTHFR1 PE=1 SV=1	5.215	5.291	0.211337	0.117983	0.754851	0.16466	2.026	2.353	0.172726	0.949634	0.414021	0.56118
O82662	Succinyl-CoA ligase [ADP-forming] subunit beta, mitochondrial GN=At2g20420 PE=1 SV=1	4.998	4.495	0.0486044	-0.40417	0.239433	-0.177783	2.135	2.231	0.481905	0.619863	1.10072	0.550884
Q9S726	Probable ribose-5-phosphate isomerase 3, chloroplastic GN=RPI3 PE=1 SV=1	4.232	4.383	-0.525834	-0.477638	1.51495	-0.501736	2.004	2.367	0.110323	0.987477	0.367371	0.5489
O48737	Thioredoxin M1, chloroplastic GN=At1g03680 PE=2 SV=1	4.709	4.919	-0.168122	-0.126038	1.04352	-0.14708	2.173	2.189	0.589693	0.506335	1.31583	0.548014
P53492	Actin-7 GN=ACT7 PE=1 SV=1	5.812	5.776	0.659039	0.436128	0.893363	0.547584	2.293	2.056	0.930073	0.146831	0.397593	0.538452
O04499	2,3-bisphosphoglycerate-independent phosphoglycerate mutase 1 GN=PGM1 PE=2 SV=3	6.374	4.636	1.08049	-0.311678	0.168268	0.384408	2.143	2.202	0.504597	0.541475	1.6491	0.523036
Q9LUT2	S-adenosylmethionine synthase 4 GN=METK4 PE=1 SV=1	4.156	4.842	-0.582828	-0.176548	0.504801	-0.379688	1.947	2.404	-0.051358	1.08749	0.275689	0.518066
O65423	AT4g21580/F18E5_200 GN=F18E5.200 PE=2 SV=1	3.569	4.149	-1.02303	-0.631135	0.829463	-0.827083	2.146	2.187	0.513107	0.500929	2.11664	0.507018
F4HQ30	Putative glycerophosphoryl diester phosphodiesterase 3 GN=SVL2 PE=4 SV=1	3.963	5.908	-0.727562	0.522717	0.0473942	-0.102423	2.482	1.834	1.46617	-0.453245	0.160605	0.506465
O04379	Protein argonaute 1 GN=AGO1 PE=1 SV=1	5.568	5.77	0.476058	0.432193	1.51254	0.454125	2.033	2.297	0.192582	0.798264	0.456808	0.495423
Q9S9N9	Cinnamoyl-CoA reductase 1 GN=CCR1 PE=1 SV=1	5.704	6.323	0.578048	0.794944	1.00111	0.686496	2.152	2.169	0.530126	0.452274	1.29805	0.4912
Q9ZPI5	Peroxisomal fatty acid beta-oxidation multifunctional protein MFP2 GN=MFP2 PE=1 SV=1	5.217	4.541	0.212837	-0.373995	0.081249	-0.0805792	2.045	2.27	0.22662	0.725282	0.512576	0.475951
Q8H168	Putative uncharacterized protein At5g11420 GN=At5g11420 PE=2 SV=1	4.083	3.985	-0.637572	-0.738714	1.33068	-0.688143	1.976	2.34	0.0309005	0.914494	0.320121	0.472697
B9DI04	AT1G07770 protein GN=At1g07770 PE=2 SV=1	5.473	5.492	0.404816	0.249833	0.829767	0.327325	2.071	2.233	0.300369	0.625269	0.667761	0.462819
O65396	Aminomethyltransferase, mitochondrial GN=GDCST PE=2 SV=1	4.81	4.844	-0.0923807	-0.175236	0.718644	-0.133808	2.162	2.136	0.558491	0.363074	0.876069	0.460782
Q9ZPI6	Peroxisomal fatty acid beta-oxidation multifunctional protein AIM1 GN=AIM1 PE=1 SV=1	5.341	4.844	0.305827	-0.175236	0.0802694	0.0652954	2.186	2.103	0.626567	0.273873	0.624036	0.45022
F4K7T6	1-deoxy-D-xylulose 5-phosphate reductoisomerase GN=DXR PE=3 SV=1	5.663	5.581	0.547301	0.308214	0.760733	0.427758	2.223	2.058	0.731518	0.152237	0.43253	0.441878
Q9FPF0	Protein DJ-1 homolog A GN=DJ1A PE=1 SV=1	5.365	4.169	0.323825	-0.618016	0.0929866	-0.147096	1.722	2.583	-0.689572	1.57133	0.117323	0.440881
P36428	Alanine--tRNA ligase GN=ALATS PE=1 SV=3	4.725	4.93	-0.156124	-0.118823	1.06629	-0.137473	2.182	2.096	0.615221	0.254952	0.602243	0.435087
P56797	30S ribosomal protein S2, chloroplastic GN=rps2 PE=3 SV=1	4.778	4.443	-0.116378	-0.43828	0.475255	-0.277329	2.09	2.192	0.354262	0.514444	0.93523	0.434353
F4I6W4	Phosphoglucomutase GN=At1g70730 PE=4 SV=1	5.607	5.184	0.505305	0.047794	0.356583	0.27655	1.971	2.316	0.016718	0.849622	0.312048	0.43317
Q9SGE9	Phenylalanine--tRNA ligase beta subunit, cytoplasmic GN=At1g72550 PE=2 SV=1	5.017	5.376	0.0628529	0.17374	0.554366	0.118297	2.166	2.106	0.569837	0.281983	0.683062	0.42591
Q9LUG8	AT3g23600/MDB19_9 GN=At3g23600 PE=2 SV=1	5.023	4.884	0.0673521	-0.148997	0.113355	-0.0408226	2.219	2.05	0.720172	0.130612	0.413658	0.425392
Q9FF55	Protein disulfide isomerase-like 1-4 GN=PDIL1-4 PE=1 SV=1	4.732	5.569	-0.150874	0.300342	0.0988913	0.074734	2.137	2.135	0.487579	0.360371	1.0232	0.423975
B9DHP0	AT4G27090 protein GN=At4g27090 PE=2 SV=1	4.024	3.579	-0.681817	-1.00504	0.91893	-0.843428	2.204	2.061	0.677624	0.160346	0.453362	0.418985
Q42560	Aconitate hydratase 1 GN=ACO1 PE=1 SV=2	4.749	5.198	-0.138126	0.0569776	0.125477	-0.040574	2.19	2.073	0.637913	0.192782	0.504228	0.415348
Q8LPJ5	Isocitrate dehydrogenase [NADP], chloroplastic/mitochondrial GN=At5g14590 PE=2 SV=1	5.815	5.172	0.661289	0.0399223	0.335721	0.350605	2.187	2.068	0.629404	0.179267	0.490321	0.404336
Q94CE5	Gamma-aminobutyrate transaminase POP2, mitochondrial GN=POP2 PE=1 SV=1	5.918	4.428	0.73853	-0.44812	0.0720129	0.145205	2.079	2.165	0.323061	0.441462	1.00959	0.382262
Q8H103	Glucose-6-phosphate isomerase 1, chloroplastic GN=PGI1 PE=1 SV=1	3.493	4.623	-1.08002	-0.320205	0.499611	-0.700115	2.005	2.241	0.11316	0.646893	0.409211	0.380026
F4KHY7	14-3-3-like protein GF14 kappa GN=GRF8 PE=3 SV=1	4.926	2.54	-0.00538985	-1.68659	0.302801	-0.845991	1.671	2.591	-0.834234	1.59296	0.0930601	0.379362
Q9SCY2	Peptidyl-prolyl cis-trans isomerase FKBP13, chloroplastic GN=FKBP13 PE=1 SV=2	4.967	4.151	0.0253568	-0.629823	0.279331	-0.302233	2.055	2.188	0.254985	0.503632	0.695431	0.379309
Q9FUS6	Glutathione S-transferase U13 GN=GSTU13 PE=2 SV=1	6.476	6.799	1.15699	1.10719	1.85388	1.13209	2.201	2.034	0.669115	0.0873636	0.379503	0.378239
B9DGQ1	AT5G48230 protein GN=At5g48230 PE=2 SV=1	4.961	6.072	0.0208572	0.630296	0.319718	0.325576	2.176	2.056	0.598202	0.146831	0.45996	0.372517
Q42547	Catalase-3 GN=CAT3 PE=1 SV=3	4.331	3.482	-0.451592	-1.06867	0.610002	-0.76013	2.129	2.102	0.464886	0.271171	0.785605	0.368028
Q9S7E9	Glutamate--glyoxylate aminotransferase 2 GN=GGAT2 PE=1 SV=1	4.578	4.721	-0.266362	-0.25592	1.89531	-0.261141	2.17	2.053	0.581183	0.138721	0.454894	0.359952
P42737	Beta carbonic anhydrase 2, chloroplastic GN=BCA2 PE=1 SV=3	5.205	5.079	0.203838	-0.0210829	0.247481	0.0913773	2.104	2.12	0.393974	0.319825	1.18115	0.356899
Q9ZPZ4	Putative uncharacterized protein At1g09310 GN=T31J12.3 PE=1 SV=1	4.357	5.254	-0.432094	0.0937121	0.196568	-0.169191	2.169	2.048	0.578346	0.125207	0.438574	0.351776
P48491	Triosephosphate isomerase, cytosolic GN=CTIMC PE=1 SV=2	5.134	5.547	0.150593	0.285911	0.718118	0.218252	2.079	2.14	0.323061	0.373886	1.33401	0.348474
O49006	Pectinesterase/pectinesterase inhibitor 3 GN=PME3 PE=2 SV=2	3.69	4.264	-0.93229	-0.555699	0.801874	-0.743995	1.943	2.282	-0.0627042	0.757718	0.257618	0.347507
Q9SZJ5	Serine hydroxymethyltransferase 1, mitochondrial GN=SHM1 PE=1 SV=1	4.329	4.115	-0.453092	-0.653438	0.942981	-0.553265	2.037	2.181	0.203927	0.484711	0.608231	0.344319
O23254	Serine hydroxymethyltransferase 4 GN=SHM4 PE=1 SV=1	5.004	4.551	0.0531039	-0.367435	0.228137	-0.157166	1.851	2.376	-0.323663	1.0118	0.156706	0.34407
O22265	Signal recognition particle 43 kDa protein, chloroplastic GN=CAO PE=1 SV=2	6.559	6.735	1.21923	1.0652	1.36796	1.14222	2.168	2.041	0.57551	0.106285	0.415964	0.340897
Q9FLF0	40S ribosomal protein S9-2 GN=RPS9C PE=1 SV=1	7.01	7.109	1.55744	1.31054	1.26223	1.43399	2.112	2.098	0.416666	0.260359	0.840289	0.338512
Q940B0	60S ribosomal protein L18-3 GN=RPL18C PE=2 SV=1	5.224	4.771	0.218086	-0.223122	0.00316697	-0.00251785	2.098	2.112	0.376955	0.298201	1.13121	0.337578
F4I3R1	Peptidase M1 family protein GN=At1g63770 PE=4 SV=1	4.787	5.229	-0.109629	0.0773127	0.0501092	-0.0161579	2.122	2.083	0.445031	0.219813	0.682076	0.332422
Q42262	40S ribosomal protein S3a-2 GN=RPS3AB PE=2 SV=3	6.686	7.089	1.31447	1.29742	2.38134	1.30594	1.041	3.215	-2.62123	3.27966	0.0318635	0.329211
P22953	Probable mediator of RNA polymerase II transcription subunit 37e GN=MED37E PE=1 SV=3	4.292	4.083	-0.480839	-0.674429	0.975936	-0.577634	2.094	2.108	0.365609	0.287389	1.11978	0.326499
Q8RU07	Putative malonyl-CoA GN=At2g30200 PE=2 SV=1	4.814	4.553	-0.0893808	-0.366123	0.458964	-0.227752	2.092	2.108	0.359935	0.287389	1.14843	0.323662
P29511	Tubulin alpha-6 chain GN=TUBA6 PE=1 SV=1	4.861	5.244	-0.0541347	0.0871522	0.0686183	0.0165088	1.944	2.263	-0.0598676	0.70636	0.256625	0.323246
O65581	Fructose-bisphosphate aldolase GN=M3E9.40 PE=2 SV=1	6.465	5.882	1.14874	0.505661	0.627059	0.827199	2.115	2.081	0.425175	0.214407	0.693238	0.319791
P34790	Peptidyl-prolyl cis-trans isomerase CYP18-3 GN=CYP18-3 PE=1 SV=1	4.163	3.93	-0.577578	-0.774793	1.03533	-0.676186	1.92	2.284	-0.127944	0.763124	0.217706	0.31759
Q9ZRW8	Glutathione S-transferase U19 GN=GSTU19 PE=1 SV=1	4.715	4.628	-0.163623	-0.316926	0.706428	-0.240274	2.067	2.128	0.289023	0.34145	1.27723	0.315236
Q9SVN5	Methionine--tRNA ligase, cytoplasmic GN=At4g13780 PE=2 SV=1	5.504	6.667	0.428064	1.0206	0.606998	0.724331	2.383	1.796	1.18536	-0.55596	0.108353	0.314699
P56798	30S ribosomal protein S3, chloroplastic GN=rps3 PE=3 SV=1	4.322	3.85	-0.458341	-0.82727	0.749803	-0.642806	2.009	2.18	0.124506	0.482008	0.469704	0.303257
P49204	40S ribosomal protein S4-2 GN=RPS4B PE=2 SV=4	4.443	4.55	-0.367601	-0.368091	3.37277	-0.367846	2.121	2.06	0.442194	0.157643	0.549771	0.299919
Q9LKR8	Rubisco accumulation factor 1, chloroplastic GN=RAF1 PE=2 SV=1	6.439	6.89	1.12924	1.16688	1.98149	1.14806	2.143	2.031	0.504597	0.0792544	0.397051	0.291926
P56791	50S ribosomal protein L2, chloroplastic GN=rpl2-A PE=3 SV=1	2.176	4.833	-2.06767	-0.182451	0.352647	-1.12506	2.027	2.15	0.175562	0.400917	0.624818	0.28824
Q9S9N1	Heat shock 70 kDa protein 5 GN=HSP70-5 PE=2 SV=1	7.706	8.754	2.07939	2.38961	1.35535	2.2345	2.278	1.885	0.887526	-0.315389	0.144258	0.286068
Q94AM1	Organellar oligopeptidase A, chloroplastic/mitochondrial GN=OOP PE=1 SV=1	5.348	5.491	0.311076	0.249177	1.15458	0.280127	2.052	2.111	0.246475	0.295498	1.24088	0.270987
Q94A28	Aconitate hydratase 3, mitochondrial GN=ACO3 PE=2 SV=3	5.848	5.492	0.686036	0.249833	0.556477	0.467934	1.987	2.177	0.0621022	0.473899	0.379815	0.268001
Q9C5C2	Myrosinase 2 GN=TGG2 PE=1 SV=1	3.948	4.188	-0.738811	-0.605552	1.20136	-0.672182	2.134	2.02	0.479069	0.0495211	0.362084	0.264295
P42791	60S ribosomal protein L18-2 GN=RPL18B PE=1 SV=2	5.724	5.459	0.593046	0.228186	0.57485	0.410616	2.039	2.119	0.209601	0.317122	0.892133	0.263361
F4JT64	Pectinacetylesterase family protein GN=At4g19410 PE=3 SV=1	4.499	4.721	-0.325606	-0.25592	1.11961	-0.290763	2.077	2.077	0.317388	0.203594	0.863594	0.260491
Q0WLF6	AT1G78900 protein GN=At1g78900 PE=2 SV=1	5.899	6.263	0.724282	0.755586	1.87081	0.739934	2.009	2.148	0.124506	0.395511	0.514497	0.260008
W8PUR4	Alpha-1,4 glucan phosphorylase (Fragment) GN=AT3G46970 PE=2 SV=1	5.01	4.83	0.0576035	-0.18442	0.159432	-0.063408	2.174	1.972	0.592529	-0.0802248	0.232344	0.256152
Q9M339	40S ribosomal protein S3-2 GN=RPS3B PE=1 SV=1	3.887	5.354	-0.784556	0.159309	0.202362	-0.312624	2.294	1.846	0.93291	-0.420808	0.113643	0.256051
Q9SRZ6	Cytosolic isocitrate dehydrogenase [NADP] GN=CICDH PE=2 SV=1	4.925	5.365	-0.00613972	0.166524	0.281115	0.0801924	2.148	1.998	0.51878	-0.00994566	0.290558	0.254417
F4IX26	Peptidyl-prolyl cis-trans isomerase CYP20-3 GN=ROC4 PE=4 SV=1	3.679	2.867	-0.94054	-1.47209	0.85995	-1.20631	1.88	2.279	-0.241404	0.749609	0.155933	0.254103
Q96262	Plasma membrane-associated cation-binding protein 1 GN=PCAP1 PE=1 SV=1	3.736	4.27	-0.897794	-0.551763	0.826292	-0.724779	2.104	2.034	0.393974	0.0873636	0.442399	0.240669
Q93WJ8	Monodehydroascorbate reductase 2 GN=MDAR2 PE=2 SV=1	4.842	7.47	-0.0683832	1.54734	0.27727	0.739479	1.636	2.525	-0.933512	1.41456	0.0598041	0.240523
O23255	Adenosylhomocysteinase 1 GN=SAHH1 PE=1 SV=1	3.659	3.674	-0.955538	-0.942721	2.3667	-0.94913	2.059	2.081	0.266331	0.214407	1.16434	0.240369
Q9SA18	Bifunctional aspartokinase/homoserine dehydrogenase 1, chloroplastic GN=AKHSDH1 PE=1 SV=1	4.448	4.448	-0.363852	-0.435	1.24756	-0.399426	2.017	2.124	0.147197	0.330638	0.631987	0.238918
A8MRC4	Elongation factor 1B beta GN=At1g30230 PE=1 SV=1	4.482	5.036	-0.338354	-0.0492897	0.389437	-0.193822	2.241	1.888	0.782575	-0.30728	0.131829	0.237647
F4J849	Monodehydroascorbate reductase (NADH) GN=MDAR1 PE=1 SV=1	4.898	4.5	-0.0263879	-0.40089	0.338987	-0.213639	2.069	2.068	0.294696	0.179267	0.817925	0.236982
Q9M0A7	Gamma-glutamyl peptidase 1 GN=GGP1 PE=1 SV=1	4.377	4.872	-0.417096	-0.156869	0.567051	-0.286982	2.029	2.109	0.181236	0.290092	0.840138	0.235664
Q56YA5	Serine--glyoxylate aminotransferase GN=AGT1 PE=1 SV=2	4.633	4.981	-0.225116	-0.085368	0.569846	-0.155242	2.006	2.126	0.115996	0.336043	0.54	0.22602
Q9FPU1	ROOTY/SUPERROOT1 GN=RTY/SUR1 PE=2 SV=1	4.857	5.914	-0.0571345	0.526652	0.245044	0.234759	2.138	1.987	0.490415	-0.0396792	0.258536	0.225368
Q9SRV5	5-methyltetrahydropteroyltriglutamate--homocysteine methyltransferase 2 GN=MS2 PE=1 SV=1	3.519	3.89	-1.06053	-0.801031	1.05466	-0.930779	2.113	2.003	0.419502	0.00356953	0.305761	0.211536
P56795	50S ribosomal protein L22, chloroplastic GN=rpl22 PE=3 SV=1	3.343	3.593	-1.19251	-0.995855	1.24369	-1.09418	2.124	1.991	0.450704	-0.0288669	0.267028	0.210919
Q8LD03	40S ribosomal protein S7-3 GN=RPS7C PE=1 SV=2	5.314	6.52	0.285579	0.92417	0.509756	0.604875	2.165	1.94	0.567	-0.166722	0.166176	0.200139
Q9SGS4	Thioredoxin-like protein CDSP32, chloroplastic GN=CDSP32 PE=1 SV=1	4.949	4.827	0.0118581	-0.186387	0.267246	-0.0872646	1.982	2.132	0.0479197	0.352262	0.383077	0.200091
Q94K71	Haloacid dehalogenase-like hydrolase domain-containing protein At3g48420 GN=At3g48420 PE=1 SV=1	3.672	4.103	-0.945789	-0.66131	0.952587	-0.803549	2.038	2.072	0.206764	0.190079	1.57267	0.198422
O24457	Pyruvate dehydrogenase E1 component subunit alpha-3, chloroplastic GN=PDH-E1 ALPHA PE=2 SV=1	5.832	7.919	0.674037	1.84187	0.558047	1.25795	1.937	2.176	-0.079723	0.471196	0.217025	0.195737
F4JIF9	Proteasome subunit beta type GN=PBD2 PE=3 SV=1	6.37	6.698	1.07749	1.04093	1.95916	1.05921	2.265	1.829	0.850652	-0.46676	0.0864572	0.191946
Q42449	Profilin-1 GN=PRO1 PE=1 SV=1	4.592	6.689	-0.255863	1.03503	0.184235	0.389583	1.991	2.116	0.0734484	0.309013	0.454148	0.191231
Q9SSL0	At1g70820 GN=F15H11.7 PE=2 SV=1	4.578	5.452	-0.266362	0.223594	0.0247656	-0.0213839	2.059	2.038	0.266331	0.0981762	0.560407	0.182254
P42799	Glutamate-1-semialdehyde 2,1-aminomutase 1, chloroplastic GN=GSA1 PE=2 SV=1	5.122	5.214	0.141594	0.0674733	0.66374	0.104534	1.871	2.234	-0.266932	0.627972	0.121549	0.18052
Q0WLE7	Putative uncharacterized protein At1g43170 GN=At1g43170 PE=2 SV=1	3.813	3.577	-0.84005	-1.00635	1.24272	-0.9232	2.047	2.048	0.232292	0.125207	0.732173	0.17875
P25696	Bifunctional enolase 2/transcriptional activator GN=ENO2 PE=1 SV=1	4.613	5.049	-0.240115	-0.0407621	0.405666	-0.140438	2.076	2.017	0.314551	0.041412	0.380212	0.177982
Q9ZP06	Malate dehydrogenase 1, mitochondrial GN=At1g53240 PE=1 SV=1	3.972	3.94	-0.720813	-0.768233	1.69322	-0.744523	1.97	2.127	0.0138817	0.338747	0.324289	0.176314
Q8RUF8	Omega-amidase, chloroplastic GN=NLP3 PE=1 SV=1	3.694	4.92	-0.929291	-0.125382	0.382348	-0.527336	1.836	2.265	-0.36621	0.711767	0.0955475	0.172778
Q9C4Z6	Receptor for activated C kinase 1B GN=RACK1B PE=1 SV=1	10.032	11.168	3.8237	3.97312	1.91368	3.89841	2.279	1.798	0.890362	-0.550554	0.0692744	0.169904
Q9SYG7	Aldehyde dehydrogenase family 7 member B4 GN=ALDH7B4 PE=2 SV=3	5.914	5.195	0.735531	0.0550098	0.344404	0.39527	2.076	2.005	0.314551	0.00897587	0.317098	0.161764
Q9LZH9	60S ribosomal protein L7a-2 GN=RPL7AB PE=1 SV=1	4.29	4.028	-0.482339	-0.710508	0.919663	-0.596423	2.029	2.054	0.181236	0.141424	1.10705	0.16133
B9DHI9	AT1G09640 protein GN=At1g09640 PE=2 SV=1	3.775	4.784	-0.868547	-0.214594	0.461179	-0.541571	2.205	1.869	0.680461	-0.358638	0.0921614	0.160911
Q94K73	Phenylalanine--tRNA ligase, chloroplastic/mitochondrial GN=At3g58140 PE=1 SV=1	5.537	6.144	0.452811	0.677526	0.903322	0.565168	2.053	2.028	0.249312	0.0711458	0.490754	0.160229
Q8VZB5	Putative uncharacterized protein At5g14260 GN=F18O22_50 PE=1 SV=1	4.131	4.411	-0.601576	-0.459271	1.07114	-0.530424	2.116	1.959	0.428011	-0.115364	0.175478	0.156324
O22126	Fasciclin-like arabinogalactan protein 8 GN=FLA8 PE=1 SV=1	3.263	3.828	-1.25251	-0.841702	0.908984	-1.0471	2.092	1.979	0.359935	-0.0613036	0.216527	0.149316
O65719	Heat shock 70 kDa protein 3 GN=HSP70-3 PE=1 SV=1	5.084	6.024	0.113097	0.598809	0.418891	0.355953	2.016	2.057	0.144361	0.149534	1.95066	0.146947
Q9ASR1	Elongation factor 2 GN=LOS1 PE=1 SV=1	3.995	3.891	-0.703565	-0.800376	1.38803	-0.75197	2.08	1.984	0.325897	-0.0477884	0.227172	0.139054
Q38845	Serine/threonine-protein phosphatase 2A 65 kDa regulatory subunit A alpha isoform GN=PP2AA1 PE=1 SV=1	6.364	6.848	1.07299	1.13933	1.71936	1.10616	1.935	2.125	-0.0853963	0.333341	0.180681	0.123972
C0SUV0	Putative uncharacterized protein At1g12840 (Fragment) GN=At1g12840 PE=2 SV=1	3.807	4.003	-0.84455	-0.726907	1.32267	-0.785729	2.098	1.951	0.376955	-0.136989	0.141519	0.119983
Q9LJE4	Chaperonin 60 subunit beta 2, chloroplastic GN=CPN60B2 PE=1 SV=1	3.958	4.288	-0.731312	-0.539955	1.02176	-0.635634	1.9	2.158	-0.184674	0.422541	0.117868	0.118933
P39207	Nucleoside diphosphate kinase 1 GN=NDK1 PE=1 SV=1	4.12	3.391	-0.609825	-1.12836	0.73385	-0.869093	2.037	2.01	0.203927	0.0224907	0.36646	0.113209
Q944H0	Phosphomethylethanolamine N-methyltransferase GN=NMT2 PE=2 SV=2	5.481	6.088	0.410815	0.640791	0.863075	0.525803	2.061	1.98	0.272004	-0.0586004	0.197166	0.106702
Q93WN0	Selenium-binding protein 2 GN=SBP2 PE=1 SV=1	4.738	4.718	-0.146375	-0.257888	0.766125	-0.202132	2.058	1.983	0.263494	-0.0504913	0.207238	0.106502
P42734	Probable cinnamyl alcohol dehydrogenase 9 GN=CAD9 PE=2 SV=2	5.179	5.04	0.18434	-0.0466657	0.181877	0.068837	2.054	1.985	0.252148	-0.0450852	0.212794	0.103531
Q39230	Serine--tRNA ligase, cytoplasmic GN=At5g27470 PE=2 SV=1	3.622	4.51	-0.983285	-0.39433	0.589737	-0.688807	2.008	2.03	0.121669	0.0765515	0.846263	0.0991101
Q0WRE5	Ribosomal protein L17-like protein GN=At1g67430 PE=2 SV=1	3.699	4.267	-0.925541	-0.553731	0.80475	-0.739636	2.067	1.965	0.289023	-0.099146	0.148511	0.0949383
Q8L7C9	Glutathione S-transferase U20 GN=GSTU20 PE=1 SV=1	4.725	4.209	-0.156124	-0.591777	0.473936	-0.37395	2.023	2.01	0.164216	0.0224907	0.383683	0.0933536
Q9M8D3	Probable phosphoribosylformylglycinamidine synthase, chloroplastic/mitochondrial GN=At1g74260 PE=2 SV=3	5.763	5.524	0.622293	0.270824	0.622185	0.446558	2.087	1.942	0.345753	-0.161316	0.109069	0.0922183
Q9SI75	Elongation factor G, chloroplastic GN=CPEFG PE=1 SV=1	5.123	5.138	0.142344	0.0176194	0.375102	0.0799819	2.08	1.947	0.325897	-0.147801	0.112913	0.0890482
Q9SA52	Chloroplast stem-loop binding protein of 41 kDa b, chloroplastic GN=CSP41B PE=1 SV=1	3.798	4.196	-0.851299	-0.600305	0.962577	-0.725802	2.026	2.001	0.172726	-0.0018368	0.295189	0.0854446
Q9LZ66	Assimilatory sulfite reductase (ferredoxin), chloroplastic GN=SIR PE=1 SV=1	4.603	4.248	-0.247614	-0.566194	0.62426	-0.406904	1.994	2.032	0.0819576	0.0819579	6.06143	0.0819578
P25851	Fructose-1,6-bisphosphatase, chloroplastic GN=FBP PE=1 SV=2	5.243	5.376	0.232335	0.17374	1.03986	0.203037	2.012	2.009	0.133015	0.0197879	0.391492	0.0764015
Q680A5	Ribose-phosphate pyrophosphokinase 4 GN=PRS4 PE=1 SV=2	3.622	6.03	-0.983285	0.602745	0.0705361	-0.19027	1.27	2.786	-1.97167	2.12005	0.010139	0.0741889
Q1H555	At3g11510 GN=At3g11510 PE=2 SV=1	4.288	3.426	-0.483839	-1.1054	0.624625	-0.79462	1.792	2.234	-0.491017	0.627972	0.0350486	0.0684777
P51430	40S ribosomal protein S6-2 GN=RPS6B PE=1 SV=3	4.753	4.847	-0.135126	-0.173268	1.10603	-0.154197	1.97	2.047	0.0138817	0.122503	0.368387	0.0681924
Q9SUR6	Cystine lyase CORI3 GN=CORI3 PE=1 SV=1	4.459	4.452	-0.355602	-0.432376	1.20879	-0.393989	1.946	2.067	-0.0541946	0.176564	0.161407	0.0611846
Q9M9W1	60S ribosomal protein L22-2 GN=RPL22B PE=2 SV=1	3.629	3.835	-0.978036	-0.83711	1.30691	-0.907573	1.988	2.022	0.0649388	0.0549275	1.27533	0.0599331
P10797	Ribulose bisphosphate carboxylase small chain 2B, chloroplastic GN=RBCS-2B PE=2 SV=2	3.521	3.71	-1.05903	-0.919106	1.34722	-0.989067	2.043	1.959	0.220947	-0.115364	0.093481	0.0527911
A0A075M556	Ribulose 1,5-bisphosphate carboxylase/oxygenase large subunit (Fragment) GN=rbcL PE=3 SV=1	6.419	5.805	1.11424	0.455151	0.596676	0.784696	2.183	1.809	0.618058	-0.520821	0.0242113	0.0486186
P21240	Chaperonin 60 subunit beta 1, chloroplastic GN=CPN60B1 PE=1 SV=3	4.497	4.695	-0.327105	-0.272975	1.24207	-0.30004	1.978	2.022	0.0365738	0.0549275	0.899549	0.0457506
O23247	Arginine--tRNA ligase, chloroplastic/mitochondrial GN=EMB1027 PE=1 SV=1	5.605	5.226	0.503805	0.0753447	0.392016	0.289575	1.978	2.02	0.0365738	0.0495211	1.02216	0.0430475
Q9LHT0	Tropinone reductase homolog At5g06060 GN=At5g06060 PE=2 SV=1	4.365	3.927	-0.426095	-0.776761	0.743313	-0.601428	1.784	2.22	-0.513709	0.59013	0.0195441	0.0382105
O03042	Ribulose bisphosphate carboxylase large chain GN=rbcL PE=1 SV=1	3.749	3.48	-0.888045	-1.06998	1.22927	-0.979012	2.023	1.962	0.164216	-0.107255	0.0613142	0.0284806
Q9SN86	Malate dehydrogenase, chloroplastic GN=At3g47520 PE=1 SV=1	4.687	4.792	-0.184621	-0.209346	1.399	-0.196984	1.983	1.998	0.0507563	-0.00994566	0.205383	0.0204053
A0A0K2S4Q7	Alpha-xylosidase GN=TRG1 PE=3 SV=1	5.259	5.429	0.244333	0.208507	1.29876	0.22642	1.973	2.003	0.0223913	0.00356953	0.398636	0.0129804
Q9LXG1	40S ribosomal protein S9-1 GN=RPS9B PE=1 SV=1	4.403	4.869	-0.397598	-0.158837	0.58831	-0.278217	2.014	1.956	0.138688	-0.123474	0.0163304	0.00760708
Q96291	2-Cys peroxiredoxin BAS1, chloroplastic GN=BAS1 PE=1 SV=2	4.614	4.985	-0.239365	-0.082744	0.540428	-0.161054	1.957	2.015	-0.022993	0.0360063	0.0645959	0.00650665
P25853	Beta-amylase 5 GN=BAM5 PE=2 SV=1	6.86	5.696	1.44495	0.383651	0.475237	0.914303	2.004	1.963	0.110323	-0.104552	0.00748752	0.00288533
P46643	Aspartate aminotransferase, mitochondrial GN=ASP1 PE=1 SV=1	4.391	4.494	-0.406597	-0.404826	2.85702	-0.405711	1.926	2.041	-0.110925	0.106285	0.00594571	-0.00231998
Q9LZ06	Glutathione S-transferase L3 GN=GSTL3 PE=2 SV=1	4.791	4.646	-0.106629	-0.305118	0.543683	-0.205874	2.051	1.905	0.243639	-0.261329	0.00979105	-0.00884484
Q9FJ41	GDSL esterase/lipase At5g45950 GN=At5g45950 PE=2 SV=1	4.689	5.1	-0.183121	-0.00730755	0.323664	-0.0952142	2.151	1.796	0.527289	-0.55596	0.00737831	-0.0143354
Q8LEX7	Putative uncharacterized protein PE=2 SV=1	4.353	4.733	-0.435094	-0.248049	0.7692	-0.341571	2.005	1.944	0.11316	-0.15591	0.0459066	-0.0213752
O48549	40S ribosomal protein S6-1 GN=RPS6A PE=1 SV=2	4.179	5.011	-0.56558	-0.0656887	0.370193	-0.315634	2.086	1.857	0.342916	-0.391075	0.018503	-0.0240792
Q0WSS0	Putative uncharacterized protein At1g57860 GN=At1g57660 PE=2 SV=1	3.582	3.785	-1.01328	-0.869908	1.31538	-0.941595	2.035	1.901	0.198255	-0.272141	0.0453642	-0.036943
Q93ZB6	Uroporphyrinogen decarboxylase 1, chloroplastic GN=HEME1 PE=2 SV=2	4.863	4.717	-0.0526349	-0.258544	0.42929	-0.15559	1.871	2.071	-0.266932	0.187377	0.0507867	-0.0397779
Q9SKT0	Protein THYLAKOID FORMATION 1, chloroplastic GN=THF1 PE=1 SV=1	5.768	4.076	0.626042	-0.679021	0.0113649	-0.0264893	1.883	2.057	-0.232894	0.149534	0.063804	-0.0416805
F4IT48	60S ribosomal protein L7-3 GN=At2g44120 PE=3 SV=1	4.489	5.6	-0.333105	0.320678	0.00528684	-0.00621365	2.025	1.898	0.16989	-0.28025	0.0721475	-0.0551801
Q9SKI0	At2g10940/F15K19.1 GN=At2g10940 PE=2 SV=1	4.44	4.277	-0.369851	-0.547171	0.915068	-0.458511	1.942	1.984	-0.0655405	-0.0477884	1.00473	-0.0566645
Q9FZ76	60S ribosomal protein L6-1 GN=RPL6A PE=2 SV=1	5.135	4.224	0.151343	-0.581937	0.179158	-0.215297	1.808	2.116	-0.445633	0.309013	0.0525749	-0.0683098
Q9SJQ9	Fructose-bisphosphate aldolase GN=At2g36460 PE=2 SV=1	4.924	4.008	-0.00688994	-0.723627	0.306327	-0.365259	1.873	2.04	-0.26126	0.103582	0.130593	-0.0788388
O81149	Proteasome subunit alpha type-5-A GN=PAE1 PE=1 SV=1	5.299	4.388	0.27433	-0.474358	0.0789406	-0.100014	1.928	1.976	-0.105252	-0.0694128	0.889955	-0.0873323
Q9LDZ0	Heat shock 70 kDa protein 10, mitochondrial GN=HSP70-10 PE=2 SV=1	5.149	4.881	0.161842	-0.150965	0.00971815	0.00543865	1.819	2.089	-0.414431	0.236031	0.0811381	-0.0892
P21238	Chaperonin 60 subunit alpha 1, chloroplastic GN=CPN60A1 PE=1 SV=2	4.453	4.055	-0.360102	-0.692797	0.710325	-0.526449	1.902	2.001	-0.179001	-0.0018368	0.306741	-0.0904189
Q9SIB9	Aconitate hydratase 2, mitochondrial GN=ACO2 PE=1 SV=2	4.579	5.662	-0.265612	0.361348	0.0440554	0.047868	1.859	2.045	-0.300971	0.117097	0.132996	-0.0919367
Q96327	ERBB-3 BINDING PROTEIN 1 GN=EBP1 PE=1 SV=1	4.58	4.565	-0.264862	-0.358252	1.02361	-0.311557	1.928	1.968	-0.105252	-0.0910368	1.33703	-0.0981443
Q9M9P3	UTP--glucose-1-phosphate uridylyltransferase 2 GN=UGP2 PE=1 SV=1	4.654	4.524	-0.209368	-0.385146	0.737518	-0.297257	1.975	1.918	0.0280642	-0.226189	0.237632	-0.0990625
Q9LPW0	Glyceraldehyde-3-phosphate dehydrogenase GAPA2, chloroplastic GN=GAPA2 PE=2 SV=1	4.385	3.098	-0.411096	-1.32056	0.511631	-0.865828	1.845	2.054	-0.340682	0.141424	0.124653	-0.0996287
Q9S9M7	Putative uncharacterized protein At1g16080 GN=T24D18.18 PE=1 SV=1	3.822	3.774	-0.833301	-0.877124	1.78762	-0.855213	1.966	1.92	0.00253545	-0.220783	0.294726	-0.109124
Q38900	Peptidyl-prolyl cis-trans isomerase CYP19-1 GN=CYP19-1 PE=1 SV=1	4.777	4.642	-0.117128	-0.307742	0.571093	-0.212435	1.93	1.953	-0.0995788	-0.131583	1.05758	-0.115581
Q944G9	Probable fructose-bisphosphate aldolase 2, chloroplastic GN=FBA2 PE=1 SV=2	3.017	3.391	-1.43699	-1.12836	1.11792	-1.28267	2.003	1.876	0.107486	-0.339717	0.157964	-0.116115
Q9LYG3	NADP-dependent malic enzyme 2 GN=NADP-ME2 PE=1 SV=1	4.451	4.268	-0.361602	-0.553075	0.881506	-0.457338	1.752	2.139	-0.604477	0.371183	0.0702844	-0.116647
Q9FW47	Putative uncharacterized protein T1E4.3 GN=T1E4.3 PE=4 SV=1	4.81	4.925	-0.0923807	-0.122102	1.0572	-0.107241	1.844	2.042	-0.343518	0.108988	0.157649	-0.117265
Q9C9W5	Glycerate dehydrogenase HPR, peroxisomal GN=HPR PE=1 SV=1	3.756	3.744	-0.882796	-0.896803	2.30009	-0.8898	1.874	2.003	-0.258423	0.00356953	0.293459	-0.127427
Q42418	Profilin-2 GN=PRO2 PE=2 SV=1	6.215	7.126	0.961257	1.32169	1.00136	1.14147	1.853	2.02	-0.31799	0.0495211	0.223043	-0.134234
Q9C5R8	2-Cys peroxiredoxin BAS1-like, chloroplastic GN=At5g06290 PE=2 SV=3	6.955	7.604	1.5162	1.63524	1.61912	1.57572	2.057	1.804	0.260657	-0.534336	0.102961	-0.136839
Q96329	Acyl-coenzyme A oxidase 4, peroxisomal GN=ACX4 PE=1 SV=1	7.473	6.524	1.90466	0.926794	0.674286	1.41572	1.639	2.235	-0.925002	0.630675	0.0550431	-0.147164
O23627	Glycine--tRNA ligase, mitochondrial 1 GN=At1g29880 PE=1 SV=1	4.956	4.696	0.0171075	-0.272319	0.267654	-0.127606	1.94	1.916	-0.0712135	-0.231595	0.508517	-0.151404
B9DG21	Aspartate aminotransferase GN=ASP5 PE=2 SV=1	4.098	4.47	-0.626323	-0.420569	0.908173	-0.523446	1.864	1.986	-0.286788	-0.0423824	0.390838	-0.164585
Q9SA73	Obg-like ATPase 1 GN=YchF1 PE=1 SV=1	4.872	4.14	-0.0458854	-0.637039	0.34273	-0.341462	1.902	1.941	-0.179001	-0.164019	1.55615	-0.17151
P49691	60S ribosomal protein L4-2 GN=RPL4D PE=2 SV=2	4.036	4.052	-0.672819	-0.694764	1.99076	-0.683791	1.823	2.022	-0.403085	0.0549275	0.23194	-0.174079
O22229	NADPH-dependent thioredoxin reductase 3 GN=NTRC PE=1 SV=2	4.407	5.548	-0.394598	0.286567	0.0458213	-0.0540155	1.862	1.974	-0.292461	-0.0748188	0.467811	-0.18364
Q9C9C5	60S ribosomal protein L6-3 GN=RPL6C PE=2 SV=1	4.879	4.364	-0.040636	-0.490102	0.349366	-0.265369	1.953	1.878	-0.0343392	-0.334311	0.361673	-0.184325
P25856	Glyceraldehyde-3-phosphate dehydrogenase GAPA1, chloroplastic GN=GAPA1 PE=1 SV=3	4.41	4.492	-0.392349	-0.406137	1.9589	-0.399243	1.914	1.918	-0.144963	-0.226189	0.862768	-0.185576
F4JVN6	Tripeptidyl-peptidase 2 GN=TPP2 PE=1 SV=1	4.411	4.732	-0.391599	-0.248705	0.85455	-0.320152	1.947	1.883	-0.051358	-0.320796	0.399095	-0.186077
Q9M1G8	DJ-1 protein homolog F GN=DJ1F PE=1 SV=1	5.485	5.883	0.413815	0.506317	1.19528	0.460066	1.92	1.907	-0.127944	-0.255923	0.688527	-0.191933
Q8LA93	60S ribosomal protein L4-B (L1) PE=2 SV=1	5.109	4.058	0.131845	-0.690829	0.207569	-0.279492	1.954	1.863	-0.0315025	-0.374856	0.350057	-0.203179
Q01908	ATP synthase gamma chain 1, chloroplastic GN=ATPC1 PE=1 SV=1	5.037	6.133	0.0778513	0.67031	0.370192	0.374081	2.075	1.736	0.311715	-0.718143	0.118783	-0.203214
Q9FNN5	NADH dehydrogenase [ubiquinone] flavoprotein 1, mitochondrial GN=At5g08530 PE=2 SV=1	4.957	5.102	0.0178574	-0.00599539	0.151067	0.00593101	1.85	1.961	-0.326499	-0.109958	0.532844	-0.218229
P10795	Ribulose bisphosphate carboxylase small chain 1A, chloroplastic GN=RBCS-1A PE=1 SV=2	5.182	5.183	0.18659	0.0471381	0.465381	0.116864	1.744	2.066	-0.627169	0.173861	0.172529	-0.226654
F4INS6	NADP-dependent glyceraldehyde-3-phosphate dehydrogenase GN=ALDH11A3 PE=1 SV=1	3.293	3.423	-1.23001	-1.10737	1.47662	-1.16869	1.787	2.019	-0.505199	0.0468183	0.252721	-0.229191
Q9SYP2	Pyrophosphate--fructose 6-phosphate 1-phosphotransferase subunit alpha 1 GN=PFP-ALPHA1 PE=2 SV=1	5.536	5.331	0.452061	0.144222	0.517989	0.298141	2.082	1.708	0.33157	-0.793828	0.123849	-0.231129
Q9LFW1	UDP-arabinopyranose mutase 2 GN=RGP2 PE=1 SV=1	4.685	4.719	-0.186121	-0.257232	0.994612	-0.221676	1.976	1.814	0.0309005	-0.507305	0.268629	-0.238202
P49209	60S ribosomal protein L9-1 GN=RPL9B PE=1 SV=3	5.033	5.355	0.0748514	0.159965	0.654866	0.117408	1.991	1.798	0.0734484	-0.550554	0.233266	-0.238553
O04630	Threonine--tRNA ligase, mitochondrial 1 GN=THRRS PE=2 SV=3	4.748	4.844	-0.138876	-0.175236	1.1345	-0.157056	1.885	1.904	-0.227222	-0.264032	1.32227	-0.245627
O80852	Glutathione S-transferase F9 GN=GSTF9 PE=1 SV=1	6.201	5.124	0.950758	0.00843585	0.305964	0.479597	1.883	1.904	-0.232894	-0.264032	1.3997	-0.248463
P10896	Ribulose bisphosphate carboxylase/oxygenase activase, chloroplastic GN=RCA PE=1 SV=2	7.859	8.481	2.19412	2.21053	2.62509	2.20233	1.868	1.919	-0.275442	-0.223486	1.18008	-0.249464
P55229	Glucose-1-phosphate adenylyltransferase large subunit 1, chloroplastic GN=ADG2 PE=1 SV=3	4.329	4.394	-0.453092	-0.470423	1.9228	-0.461757	1.865	1.922	-0.283952	-0.215377	1.06105	-0.249664
Q9FKW6	Ferredoxin--NADP reductase, leaf isozyme 1, chloroplastic GN=LFNR1 PE=1 SV=1	3.558	3.41	-1.03128	-1.1159	1.60075	-1.07359	1.882	1.903	-0.235731	-0.266735	1.40636	-0.251233
O23715	Proteasome subunit alpha type-3 GN=PAG1 PE=1 SV=2	4.446	4.735	-0.365351	-0.246737	0.914145	-0.306044	1.615	2.18	-0.993078	0.482008	0.103655	-0.255535
Q501A9	At5g16970 GN=At5g16970 PE=2 SV=1	7.613	8.211	2.00964	2.03342	2.42676	2.02153	1.967	1.81	0.00537209	-0.518118	0.295334	-0.256373
Q9LJG3	GDSL esterase/lipase ESM1 GN=ESM1 PE=1 SV=1	5.474	5.759	0.405566	0.424977	1.82752	0.415271	1.827	1.954	-0.391739	-0.12888	0.526284	-0.260309
Q94KE3	Pyruvate kinase GN=At3g52990 PE=2 SV=1	6.052	4.841	0.83902	-0.177204	0.198933	0.330908	1.94	1.83	-0.0712135	-0.464057	0.394629	-0.267635
Q39041	Acid beta-fructofuranosidase 4, vacuolar GN=BFRUCT4 PE=2 SV=2	5.014	4.486	0.0606029	-0.410073	0.226647	-0.174735	2.031	1.733	0.186908	-0.726252	0.180219	-0.269672
Q9FH82	Pectin acetylesterase 11 GN=PAE11 PE=2 SV=1	5.13	5.991	0.147594	0.577162	0.467733	0.362378	1.786	1.99	-0.508036	-0.03157	0.336779	-0.269803
Q9C522	ATP-citrate synthase beta chain protein 1 GN=ACLB-1 PE=2 SV=1	4.986	5.631	0.0396053	0.341013	0.37019	0.190309	1.763	2.012	-0.573275	0.0278971	0.274942	-0.272689
Q38951	Serine/threonine-protein phosphatase 2A 65 kDa regulatory subunit A gamma isoform GN=PP2AA3 PE=1 SV=2	5.746	7.358	0.609544	1.47387	0.601449	1.04171	1.987	1.775	0.0621022	-0.612724	0.248486	-0.275311
Q8W493	Ferredoxin--NADP reductase, leaf isozyme 2, chloroplastic GN=LFNR2 PE=1 SV=1	3.786	3.706	-0.860298	-0.92173	1.65881	-0.891014	1.854	1.911	-0.315153	-0.24511	1.1014	-0.280132
P42761	Glutathione S-transferase F10 GN=GSTF10 PE=1 SV=3	5.63	4.594	0.522554	-0.339229	0.0622002	0.0916625	1.91	1.849	-0.156309	-0.412699	0.569425	-0.284504
Q9FVT2	Probable elongation factor 1-gamma 2 GN=At1g57720 PE=2 SV=1	4.41	4.034	-0.392349	-0.706572	0.751284	-0.54946	1.889	1.87	-0.215875	-0.355935	0.815526	-0.285905
F4JBC9	Peroxiredoxin Q GN=ATPRX Q PE=4 SV=1	3.893	3.831	-0.780057	-0.839734	1.62997	-0.809895	2.01	1.743	0.127342	-0.699221	0.211348	-0.28594
Q9SXJ7	Chaperone protein ClpC2, chloroplastic GN=CLPC2 PE=1 SV=1	8.345	8.861	2.55859	2.4598	1.90203	2.50919	1.777	1.986	-0.533564	-0.0423824	0.347234	-0.287973
P38666	60S ribosomal protein L24-2 GN=RPL24B PE=1 SV=2	3.755	4.776	-0.883546	-0.219842	0.462495	-0.551694	1.916	1.837	-0.13929	-0.445135	0.512951	-0.292213
Q9SCY0	Phosphoglucomutase, chloroplastic GN=PGMP PE=1 SV=2	5.332	4.738	0.299077	-0.244769	0.0284286	0.0271542	1.949	1.801	-0.0456851	-0.542445	0.350169	-0.294065
Q38858	Calreticulin-2 GN=CRT2 PE=1 SV=3	3.385	2.806	-1.16102	-1.5121	1.0802	-1.33656	1.764	1.986	-0.570439	-0.0423824	0.344106	-0.306411
O04496	Aspartyl protease AED3 GN=AED3 PE=1 SV=1	5.515	6.13	0.436313	0.668342	0.880071	0.552327	1.828	1.918	-0.388903	-0.226189	0.783472	-0.307546
B9DFR6	Cysteine synthase GN=OASC PE=2 SV=1	6.718	8.852	1.33847	2.45389	0.739666	1.89618	1.735	2.012	-0.652698	0.0278971	0.27803	-0.3124
O22886	Uroporphyrinogen decarboxylase 2, chloroplastic GN=HEME2 PE=2 SV=1	4.968	4.778	0.0261066	-0.21853	0.239808	-0.0962117	1.928	1.809	-0.105252	-0.520821	0.428226	-0.313036
F4HSX1	Adenine phosphoribosyl transferase 1 GN=APT1 PE=1 SV=1	7.027	6.088	1.57019	0.640791	0.596312	1.10549	1.725	2.016	-0.681063	0.0387091	0.270718	-0.321177
G1JSH2	At1g58380 GN=At1g58380 PE=3 SV=1	4.395	4.31	-0.403597	-0.525524	1.08057	-0.464561	2.072	1.641	0.303205	-0.974932	0.159923	-0.335863
Q9LR30	Glutamate--glyoxylate aminotransferase 1 GN=GGAT1 PE=1 SV=1	4.693	4.092	-0.180121	-0.668526	0.478269	-0.424323	1.812	1.912	-0.434286	-0.242408	0.754738	-0.338347
P57106	Malate dehydrogenase, cytoplasmic 2 GN=MDH2 PE=1 SV=1	1.675	1.786	-2.44338	-2.18119	1.44305	-2.31229	1.949	1.768	-0.0456851	-0.631645	0.34291	-0.338665
Q6KGZ1	30S ribosomal protein S7, chloroplastic GN=rps7 PE=3 SV=1	6.333	4.079	1.04975	-0.677053	0.0631473	0.186347	1.758	1.967	-0.587458	-0.09374	0.398739	-0.340599
Q08112	40S ribosomal protein S15-1 GN=RPS15A PE=2 SV=1	7.263	7.774	1.74717	1.74676	4.12154	1.74696	1.766	1.957	-0.564766	-0.12077	0.436656	-0.342768
O82122	Vegetative storage protein 2 GN=VSP2 PE=2 SV=1	6.265	6.634	0.998752	0.998951	4.19867	0.998852	1.75	1.972	-0.61015	-0.0802248	0.380101	-0.345187
Q9S757	Bifunctional L-3-cyanoalanine synthase/cysteine synthase C1, mitochondrial GN=CYSC1 PE=1 SV=1	3.772	2.867	-0.870797	-1.47209	0.796059	-1.17144	1.972	1.734	0.0195546	-0.723549	0.286341	-0.351997
Q9LRR9	Peroxisomal (S)-2-hydroxy-acid oxidase GLO1 GN=GLO1 PE=1 SV=1	4.41	4.45	-0.392349	-0.433688	1.49711	-0.413018	1.89	1.809	-0.213039	-0.520821	0.597199	-0.36693
Q8LFV7	Phosphoglycerate kinase PE=2 SV=1	4.325	4.246	-0.456092	-0.567506	1.16101	-0.511799	1.768	1.936	-0.559093	-0.177534	0.516757	-0.368314
O04316	Nitrile-specifier protein 4 GN=NSP4 PE=2 SV=1	4.153	4.186	-0.585078	-0.606864	1.93423	-0.595971	1.862	1.837	-0.292461	-0.445135	0.886263	-0.368798
F4JD96	60S ribosomal protein L13a-1 GN=At3g07110 PE=3 SV=1	4.663	4.326	-0.202619	-0.515028	0.582719	-0.358824	1.908	1.788	-0.161982	-0.577585	0.486871	-0.369783
P93819	Malate dehydrogenase, cytoplasmic 1 GN=MDH1 PE=1 SV=2	3.052	3.588	-1.41074	-0.999135	0.967805	-1.20494	1.946	1.748	-0.0541946	-0.685706	0.346991	-0.36995
O82660	Photosystem II stability/assembly factor HCF136, chloroplastic GN=HCF136 PE=1 SV=1	4.926	5.108	-0.00538985	-0.00205985	0.572504	-0.00372485	1.815	1.884	-0.425777	-0.318093	1.03847	-0.371935
Q9XI10	DPP6 N-terminal domain-like protein GN=F8K7.10 PE=2 SV=1	3.699	4.775	-0.925541	-0.220498	0.454558	-0.57302	2.178	1.485	0.603875	-1.39661	0.119294	-0.396366
O23016	Probable voltage-gated potassium channel subunit beta GN=KAB1 PE=1 SV=1	4.614	3.859	-0.239365	-0.821367	0.495564	-0.530366	1.874	1.802	-0.258423	-0.539742	0.666097	-0.399083
Q9FWR4	Glutathione S-transferase DHAR1, mitochondrial GN=DHAR1 PE=1 SV=1	3.567	3.738	-1.02453	-0.900739	1.38852	-0.962635	1.729	1.954	-0.669717	-0.12888	0.421396	-0.399298
P50318	Phosphoglycerate kinase 2, chloroplastic GN=At1g56190 PE=2 SV=3	6.758	7.05	1.36846	1.27183	1.63286	1.32015	1.72	1.953	-0.695245	-0.131583	0.419165	-0.413414
Q8LEK1	Putative uncharacterized protein PE=2 SV=1	6.241	7.035	0.980754	1.26199	1.10008	1.12137	1.986	1.667	0.0592655	-0.904652	0.266284	-0.422693
Q9LK73	UDP-glycosyltransferase 88A1 GN=UGT88A1 PE=2 SV=1	5.556	5.862	0.46706	0.492542	1.77207	0.479801	1.862	1.797	-0.292461	-0.553257	0.720275	-0.422859
F4IAH9	Lactoylglutathione lyase GN=GLX1 PE=1 SV=1	4.868	6.124	-0.0488853	0.664406	0.262206	0.30776	1.828	1.824	-0.388903	-0.480275	1.17601	-0.434589
P42794	60S ribosomal protein L11-2 GN=RPL11B PE=2 SV=2	4.461	5.051	-0.354103	-0.03945	0.367172	-0.196776	1.92	1.722	-0.127944	-0.755985	0.40531	-0.441965
Q9LD57	Phosphoglycerate kinase 1, chloroplastic GN=PGK1 PE=1 SV=1	4.334	4.146	-0.449342	-0.633103	0.970393	-0.541223	1.775	1.873	-0.539237	-0.347826	0.868715	-0.443532
Q9SRG3	Protein disulfide isomerase-like 1-2 GN=PDIL1-2 PE=2 SV=1	5.454	5.92	0.390568	0.530588	1.01757	0.460578	1.878	1.762	-0.247077	-0.647864	0.571783	-0.44747
Q29Q34	Alcohol dehydrogenase-like protein GN=At5g19440 PE=2 SV=1	4.843	5.679	-0.0676333	0.372499	0.211589	0.152433	1.765	1.88	-0.567602	-0.328905	0.780786	-0.448254
P25857	Glyceraldehyde-3-phosphate dehydrogenase GAPB, chloroplastic GN=GAPB PE=1 SV=2	4.246	4.338	-0.515335	-0.507157	2.29312	-0.511246	1.85	1.789	-0.326499	-0.574881	0.766554	-0.45069
Q43316	Porphobilinogen deaminase, chloroplastic GN=HEMC PE=1 SV=1	3.266	3.421	-1.25026	-1.10868	1.41837	-1.17947	1.886	1.743	-0.224385	-0.699221	0.519543	-0.461803
Q42029	Oxygen-evolving enhancer protein 2-1, chloroplastic GN=PSBP1 PE=1 SV=2	4.939	4.242	0.00435911	-0.57013	0.296823	-0.282885	1.825	1.796	-0.397412	-0.55596	0.979177	-0.476686
P34795	Glucose-6-phosphate isomerase, cytosolic GN=PGIC PE=1 SV=1	6.948	7.231	1.51095	1.39057	1.57843	1.45076	1.873	1.737	-0.26126	-0.71544	0.557361	-0.48835
Q9S9P1	40S ribosomal protein S12-1 GN=RPS12A PE=2 SV=1	2.124	1.987	-2.10666	-2.04934	2.05651	-2.078	1.696	1.922	-0.763321	-0.215377	0.488218	-0.489349
P57751	UTP--glucose-1-phosphate uridylyltransferase 1 GN=UGP1 PE=2 SV=1	4.762	5.885	-0.128377	0.507629	0.181978	0.189626	1.734	1.88	-0.655534	-0.328905	0.690477	-0.492219
O49195	Vegetative storage protein 1 GN=VSP1 PE=1 SV=2	4.062	5.703	-0.653321	0.388243	0.0750242	-0.132539	1.649	1.96	-0.896637	-0.112661	0.37631	-0.504649
P21276	Superoxide dismutase [Fe] 1, chloroplastic GN=FSD1 PE=1 SV=4	3.905	2.708	-0.771058	-1.57639	0.676968	-1.17372	1.781	1.821	-0.522218	-0.488384	1.67151	-0.505301
Q8S9L5	Trigger factor-like protein TIG, Chloroplastic GN=TIG PE=1 SV=1	4.755	4.492	-0.133626	-0.406137	0.526304	-0.269882	1.781	1.816	-0.522218	-0.501899	1.89863	-0.512059
Q9M8M7	Acetylornithine aminotransferase, chloroplastic/mitochondrial GN=WIN1 PE=1 SV=1	3.508	3.345	-1.06878	-1.15854	1.59106	-1.11366	1.841	1.746	-0.352028	-0.691112	0.698793	-0.52157
W8PVH6	Glycosyltransferase (Fragment) GN=AT3G02230 PE=2 SV=1	5.22	5.422	0.215086	0.203915	1.77033	0.209501	1.84	1.724	-0.354864	-0.750579	0.659869	-0.552722
P31265	Translationally-controlled tumor protein 1 GN=TCTP1 PE=1 SV=2	3.68	4.077	-0.93979	-0.678365	0.99153	-0.809077	1.803	1.756	-0.459815	-0.664082	0.941364	-0.561948
Q9M1X0	Ribosome-recycling factor, chloroplastic GN=RRF PE=2 SV=2	3.839	4.7	-0.820553	-0.269696	0.526018	-0.545124	1.729	1.826	-0.669717	-0.474869	0.969216	-0.572293
O80476	Methylesterase 2 GN=MES2 PE=1 SV=1	8.116	6.032	2.38685	0.604057	0.46572	1.49546	1.916	1.619	-0.13929	-1.0344	0.382175	-0.586844
Q5XF32	3-isopropylmalate dehydrogenase GN=At5g14200 PE=2 SV=1	3.635	5.02	-0.973536	-0.0597851	0.336342	-0.516661	1.784	1.755	-0.513709	-0.666785	1.08569	-0.590247
Q8LER3	Probable xyloglucan endotransglucosylase/hydrolase protein 7 GN=XTH7 PE=2 SV=2	4.599	5.405	-0.250614	0.192764	0.0374398	-0.028925	1.719	1.823	-0.698082	-0.482978	0.940478	-0.59053
Q8L7K9	NAD-dependent malic enzyme 2, mitochondrial GN=NAD-ME2 PE=1 SV=1	4.302	5.475	-0.47334	0.238681	0.0983631	-0.117329	2.006	1.516	0.115996	-1.31281	0.254844	-0.598408
P48641	Glutathione reductase, cytosolic GN=At3g24170 PE=2 SV=1	5.321	4.885	0.290828	-0.148341	0.0967624	0.0712437	1.657	1.869	-0.873945	-0.358638	0.598439	-0.616292
Q5PNZ9	At1g22780 GN=PFL PE=2 SV=1	4.528	4.215	-0.303858	-0.587841	0.707121	-0.44585	1.811	1.704	-0.437123	-0.80464	0.737105	-0.620882
Q9M385	50S ribosomal protein L17, chloroplastic GN=RPL17 PE=2 SV=1	2.705	2.675	-1.67096	-1.59804	1.84773	-1.6345	1.723	1.795	-0.686736	-0.558663	1.1855	-0.622699
Q94EG6	Uncharacterized protein At5g02240 GN=At5g02240 PE=1 SV=1	3.236	3.652	-1.27275	-0.957153	1.04814	-1.11495	1.725	1.776	-0.681063	-0.610021	1.456	-0.645542
Q8VZH2	Aminopeptidase M1 GN=APM1 PE=1 SV=1	4.839	4.38	-0.0706328	-0.479606	0.390499	-0.275119	1.638	1.863	-0.927839	-0.374856	0.5925	-0.651348
P47999	Cysteine synthase, chloroplastic/chromoplastic GN=OASB PE=1 SV=2	6.015	5.711	0.811272	0.39349	0.672635	0.602381	1.697	1.793	-0.760485	-0.564069	1.02817	-0.662277
B9DGD6	Acetyl-coenzyme A synthetase, chloroplastic/glyoxysomal GN=ACS PE=1 SV=1	4.676	5.148	-0.19287	0.0241789	0.237025	-0.0843454	1.8	1.68	-0.468325	-0.869513	0.731712	-0.668919
Q42589	Non-specific lipid-transfer protein 1 GN=LTP1 PE=2 SV=1	3.119	2.441	-1.36049	-1.75153	1.09921	-1.55601	1.527	1.961	-1.24269	-0.109958	0.352797	-0.676325
F4K2Y3	Putative S9 Tyrosyl aminopeptidase GN=At5g36210 PE=1 SV=1	5.294	6.225	0.270581	0.730659	0.561911	0.50062	1.832	1.638	-0.377556	-0.983041	0.574217	-0.680299
Q93VT9	60S ribosomal protein L10-1 GN=RPL10A PE=1 SV=1	3.756	4.905	-0.882796	-0.135222	0.394438	-0.509009	1.698	1.773	-0.757649	-0.61813	1.19152	-0.687889
P59223	40S ribosomal protein S13-1 GN=RPS13A PE=2 SV=1	4.427	4.535	-0.3796	-0.377931	2.85307	-0.378765	1.749	1.715	-0.612987	-0.774907	1.13113	-0.693947
Q9S7E4	Formate dehydrogenase, chloroplastic/mitochondrial GN=FDH1 PE=1 SV=1	3.407	3.609	-1.14452	-0.985359	1.32345	-1.06494	1.803	1.657	-0.459815	-0.931683	0.681654	-0.695749
Q9SRD4	Indole glucosinolate O-methyltransferase 5 GN=IGMT5 PE=2 SV=1	6.982	7.933	1.53644	1.85106	1.22947	1.69375	1.888	1.559	-0.218712	-1.19658	0.414642	-0.707647
O23553	Beta-amylase 3, chloroplastic GN=BAM3 PE=1 SV=3	5.918	5.329	0.73853	0.14291	0.422147	0.44072	1.685	1.771	-0.794523	-0.623536	1.11694	-0.70903
F4K5B9	Aspartyl protease family protein GN=At5g07030 PE=3 SV=1	6.639	7.71	1.27922	1.70478	1.04488	1.492	1.943	1.494	-0.0627042	-1.37228	0.327043	-0.717492
Q9C5A9	ATP synthase subunit beta-3, mitochondrial GN=At5g08680 PE=2 SV=1	6.969	7.432	1.5267	1.52242	3.04883	1.52456	1.599	1.854	-1.03846	-0.399184	0.574515	-0.718823
P46286	60S ribosomal protein L8-1 GN=RPL8A PE=1 SV=2	4.002	3.213	-0.698316	-1.24512	0.757941	-0.97172	1.61	1.834	-1.00726	-0.453245	0.636736	-0.730253
Q9SAU2	D-ribulose-5-phosphate-3-epimerase GN=RPE PE=2 SV=1	5.099	4.631	0.124346	-0.314958	0.131132	-0.0953057	1.729	1.704	-0.669717	-0.80464	1.23584	-0.737178
Q8GZQ3	Polyribonucleotide nucleotidyltransferase 1, chloroplastic GN=PNP1 PE=1 SV=1	4.176	4.504	-0.56783	-0.398266	0.956208	-0.483048	1.775	1.654	-0.539237	-0.939792	0.77373	-0.739515
Q9MBH2	AIG2 protein-like GN=At3g28940 PE=2 SV=1	3.769	3.9	-0.873047	-0.794472	1.52323	-0.833759	1.749	1.679	-0.612987	-0.872216	0.958574	-0.742601
P52032	Phospholipid hydroperoxide glutathione peroxidase 1, chloroplastic GN=GPX1 PE=2 SV=2	4.382	5.456	-0.413346	0.226218	0.0868269	-0.0935642	1.868	1.543	-0.275442	-1.23983	0.4427	-0.757636
O65902	Cyclase-associated protein 1 GN=CAP1 PE=2 SV=1	4.593	3.893	-0.255113	-0.799064	0.518183	-0.527088	1.776	1.639	-0.536401	-0.980338	0.741674	-0.758369
P17745	Elongation factor Tu, chloroplastic GN=TUFA PE=1 SV=1	7.211	7.579	1.70818	1.61884	1.76727	1.66351	1.659	1.758	-0.868272	-0.658676	1.06127	-0.763474
Q9M401	Branched-chain-amino-acid aminotransferase 3, chloroplastic GN=BCAT3 PE=1 SV=1	5.291	5.037	0.268331	-0.0486335	0.211729	0.109849	1.831	1.574	-0.380393	-1.15604	0.526331	-0.768214
Q9S7B5	Threonine synthase 1, chloroplastic GN=TS1 PE=1 SV=1	3.42	4.133	-1.13477	-0.641631	0.763493	-0.8882	1.711	1.698	-0.720774	-0.820858	1.38434	-0.770816
O65355	Gamma-glutamyl hydrolase 2 GN=GGH2 PE=1 SV=2	3.894	4.188	-0.779307	-0.605552	1.09985	-0.69243	1.701	1.704	-0.749139	-0.80464	1.64339	-0.77689
A7WM73	Beta-hexosaminidase 1 GN=HEXO1 PE=1 SV=1	4.431	3.264	-0.3766	-1.21167	0.511227	-0.794135	1.758	1.638	-0.587458	-0.983041	0.803861	-0.785249
B9DFU6	AT3G08590 protein GN=At3g08590 PE=2 SV=1	4.391	3.885	-0.406597	-0.804311	0.694591	-0.605454	1.485	1.921	-1.36182	-0.21808	0.399124	-0.789952
P56802	30S ribosomal protein S11, chloroplastic GN=rps11 PE=3 SV=1	3.068	3.386	-1.39874	-1.13164	1.17424	-1.26519	1.647	1.735	-0.90231	-0.720846	1.14949	-0.811578
P42644	14-3-3-like protein GF14 psi GN=GRF3 PE=1 SV=2	2.229	5.005	-2.02792	-0.0696246	0.320434	-1.04877	2.246	1.098	0.796758	-2.44268	0.154452	-0.822963
Q9LXC9	Soluble inorganic pyrophosphatase 6, chloroplastic GN=PPA6 PE=1 SV=1	3.921	4.481	-0.759059	-0.413353	0.73863	-0.586206	1.739	1.62	-0.641352	-1.0317	0.835881	-0.836524
Q9SPK5	Formate--tetrahydrofolate ligase GN=THFS PE=2 SV=1	4.598	4.851	-0.251364	-0.170644	0.919677	-0.211004	1.729	1.62	-0.669717	-1.0317	0.874674	-0.850706
B9DFH4	AT2G47510 protein GN=At2g47510 PE=2 SV=1	7.521	8.075	1.94065	1.9442	3.23492	1.94243	1.571	1.779	-1.11788	-0.601912	0.731519	-0.859898
Q9SAK4	Succinate-semialdehyde dehydrogenase, mitochondrial GN=ALDH5F1 PE=1 SV=2	3.734	4.001	-0.899294	-0.728219	1.17605	-0.813756	1.843	1.487	-0.346355	-1.3912	0.462604	-0.868777
Q94AR8	3-isopropylmalate dehydratase large subunit GN=IIL1 PE=1 SV=1	7.917	8.272	2.23762	2.07343	1.61557	2.15552	1.463	1.875	-1.42423	-0.34242	0.456191	-0.883324
P37702	Myrosinase 1 GN=TGG1 PE=1 SV=1	3.206	4.145	-1.29525	-0.633759	0.677143	-0.964505	1.747	1.572	-0.61866	-1.16144	0.724885	-0.890051
Q949Y3	Bifunctional purple acid phosphatase 26 GN=PAP26 PE=1 SV=1	10.643	12.495	4.2819	4.84359	1.40742	4.56275	1.24	2.099	-2.05677	0.263061	0.235836	-0.896854
Q9S795	Betaine aldehyde dehydrogenase 1, chloroplastic GN=ALDH10A8 PE=2 SV=1	7.981	7.678	2.28561	1.68378	1.01867	1.9847	2.011	1.281	0.130178	-1.94803	0.265617	-0.908924
Q944I4	D-glycerate 3-kinase, chloroplastic GN=GLYK PE=1 SV=2	4.255	4.136	-0.508586	-0.639663	1.14051	-0.574124	1.627	1.678	-0.95904	-0.874919	1.53491	-0.91698
Q9C7N4	GDSL esterase/lipase At1g29670 GN=At1g29670 PE=2 SV=1	6.597	7.134	1.24773	1.32694	1.7082	1.28733	1.73	1.566	-0.66688	-1.17766	0.764523	-0.92227
Q9SEU8	Thioredoxin M2, chloroplastic GN=At4g03520 PE=1 SV=2	3.703	3.024	-0.922542	-1.3691	0.911795	-1.14582	1.492	1.81	-1.34197	-0.518118	0.576044	-0.930043
P49637	60S ribosomal protein L27a-3 GN=RPL27AC PE=2 SV=2	5.649	5.606	0.536802	0.324613	0.813172	0.430708	1.571	1.727	-1.11788	-0.74247	0.896998	-0.930177
P56801	30S ribosomal protein S8, chloroplastic GN=rps8 PE=3 SV=1	4.239	4.141	-0.520585	-0.636383	1.19718	-0.578484	1.526	1.769	-1.24553	-0.628942	0.69398	-0.937235
F4IS32	Acyl-[acyl-carrier-protein] desaturase GN=SSI2 PE=1 SV=1	5.004	4.645	0.0531039	-0.305774	0.215048	-0.126335	1.628	1.66	-0.956204	-0.923574	1.95665	-0.939889
Q0WLF5	Cysteine synthase GN=At4g14880 PE=2 SV=1	4.105	3.888	-0.621074	-0.802343	1.09346	-0.711709	1.827	1.446	-0.391739	-1.50202	0.471619	-0.946882
Q9LR44	UDP-glycosyltransferase 75B1 GN=UGT75B1 PE=1 SV=1	6.242	6.472	0.981504	0.892684	1.52074	0.937094	1.587	1.687	-1.0725	-0.850592	1.13586	-0.961546
Q9ZPF5	Arginase 2, mitochondrial GN=ARGAH2 PE=2 SV=1	3.896	4.24	-0.777807	-0.571442	1.01493	-0.674625	1.55	1.724	-1.17745	-0.750579	0.857886	-0.964015
O80934	Uncharacterized protein At2g37660, chloroplastic GN=At2g37660 PE=1 SV=2	3.089	4.01	-1.38299	-0.722315	0.713128	-1.05265	1.607	1.661	-1.01577	-0.920871	1.50625	-0.968321
O23515	60S ribosomal protein L15-1 GN=RPL15A PE=2 SV=1	4.891	4.838	-0.0316373	-0.179172	0.410346	-0.105405	1.695	1.567	-0.766158	-1.17496	0.878962	-0.970557
Q8W593	Probable lactoylglutathione lyase, chloroplastic GN=At1g67280 PE=1 SV=1	3.312	4.805	-1.21576	-0.200819	0.402541	-0.708289	1.552	1.712	-1.17178	-0.783016	0.903166	-0.977397
Q9SU63	Aldehyde dehydrogenase family 2 member B4, mitochondrial GN=ALDH2B4 PE=2 SV=1	3.401	4.749	-1.14902	-0.237553	0.431551	-0.693285	2.021	1.212	0.158543	-2.13454	0.261855	-0.987997
Q0WSH0	40S ribosomal protein S19-like GN=At5g15520 PE=2 SV=1	6.381	8.077	1.08574	1.94552	0.754618	1.51563	1.409	1.854	-1.5774	-0.399184	0.465711	-0.988291
P59230	60S ribosomal protein L10a-2 GN=RPL10AB PE=1 SV=1	3.451	3.293	-1.11152	-1.19265	1.64966	-1.15208	1.274	1.985	-1.96033	-0.0450852	0.313935	-1.00271
P56807	30S ribosomal protein S18, chloroplastic GN=rps18 PE=3 SV=1	3.685	4.283	-0.93604	-0.543235	0.7819	-0.739638	1.694	1.508	-0.768994	-1.33444	0.776808	-1.05172
F4JM15	PfkB-like carbohydrate kinase family protein GN=At4g28706 PE=3 SV=1	4.964	5.4	0.0231072	0.189484	0.37392	0.106295	1.654	1.547	-0.882455	-1.22902	0.984778	-1.05574
Q42403	Thioredoxin H3 GN=TRX3 PE=1 SV=1	3.51	5.591	-1.06728	0.314774	0.165844	-0.376251	1.613	1.589	-0.998751	-1.11549	1.4545	-1.05712
P92947	Monodehydroascorbate reductase 5, mitochondrial GN=MDAR5 PE=1 SV=3	5.516	4.988	0.437062	-0.0807762	0.210176	0.178143	1.557	1.646	-1.1576	-0.961416	1.23084	-1.05951
Q9LYJ3	ADP-ribosylation factor A1B GN=T15N1_160 PE=3 SV=1	4.737	5.594	-0.147125	0.316742	0.109675	0.0848085	1.573	1.626	-1.11221	-1.01548	1.53874	-1.06384
Q05431	L-ascorbate peroxidase 1, cytosolic GN=APX1 PE=1 SV=2	3.408	4.192	-1.14377	-0.602929	0.718603	-0.873348	1.707	1.467	-0.73212	-1.44526	0.69573	-1.08869
Q9FJY6	Aldose 1-epimerase family protein GN=At5g66530 PE=2 SV=1	5.699	5.534	0.574298	0.277384	0.670497	0.425841	1.53	1.649	-1.23418	-0.953307	1.08992	-1.09374
Q94JQ4	Reactive Intermediate Deaminase A, chloroplastic GN=RIDA PE=1 SV=1	3.456	3.495	-1.10777	-1.06014	1.85433	-1.08396	1.572	1.601	-1.11505	-1.08305	2.03312	-1.09905
Q42134	Proteasome subunit alpha type-5-B GN=PAE2 PE=1 SV=2	8.1	8.654	2.37486	2.32401	2.16189	2.34943	1.442	1.726	-1.48379	-0.745173	0.690989	-1.11448
Q93ZN9	LL-diaminopimelate aminotransferase, chloroplastic GN=DAP PE=1 SV=1	4.562	4.476	-0.278361	-0.416633	0.903	-0.347497	1.523	1.63	-1.25404	-1.00467	1.15489	-1.12935
Q9LE06	Methionine aminotransferase BCAT4 GN=BCAT4 PE=1 SV=1	3.823	3.684	-0.832551	-0.936161	1.42887	-0.884356	1.627	1.517	-0.95904	-1.31011	1.01002	-1.13457
P56799	30S ribosomal protein S4, chloroplastic GN=rps4 PE=3 SV=1	4.127	4.438	-0.604576	-0.44156	1.00696	-0.523068	1.547	1.593	-1.18596	-1.10468	1.64626	-1.14532
P60040	60S ribosomal protein L7-2 GN=RPL7B PE=2 SV=1	5.074	4.856	0.105598	-0.167364	0.0663453	-0.0308831	1.603	1.53	-1.02712	-1.27497	1.16572	-1.15104
Q9FGY1	Beta-D-xylosidase 1 GN=BXL1 PE=1 SV=1	7.5	7.209	1.9249	1.37613	0.979334	1.65052	1.507	1.629	-1.29942	-1.00737	1.09597	-1.15339
O48588	Molybdenum cofactor sulfurase family protein GN=T19K24.17 PE=2 SV=1	5.343	6.217	0.307326	0.725411	0.611038	0.516369	1.418	1.721	-1.55187	-0.758688	0.676711	-1.15528
Q9FUS8	Glutathione S-transferase U17 GN=GSTU17 PE=2 SV=1	3.866	3.322	-0.800305	-1.17362	0.924472	-0.986964	1.548	1.584	-1.18312	-1.12901	1.82686	-1.15606
Q9SAC6	Alpha-glucan water dikinase 1, chloroplastic GN=GWD1 PE=1 SV=2	3.687	4.668	-0.93454	-0.290687	0.511421	-0.612613	1.407	1.713	-1.58307	-0.780313	0.68099	-1.18169
P30184	Leucine aminopeptidase 1 GN=LAP1 PE=1 SV=1	4.405	4.911	-0.396098	-0.131286	0.528345	-0.263692	1.498	1.615	-1.32495	-1.04521	1.12615	-1.18508
P19366	ATP synthase subunit beta, chloroplastic GN=atpB PE=1 SV=2	5.485	5.755	0.413815	0.422353	2.18708	0.418084	1.452	1.642	-1.45543	-0.972229	0.902819	-1.21383
Q94C74	Serine hydroxymethyltransferase 2, mitochondrial GN=SHM2 PE=2 SV=2	4.624	4.378	-0.231866	-0.480918	0.66959	-0.356392	1.325	1.769	-1.81567	-0.628942	0.541043	-1.2223
Q9SIU0	NAD-dependent malic enzyme 1, mitochondrial GN=NAD-ME1 PE=1 SV=1	4.938	4.603	0.00360924	-0.333325	0.295084	-0.164858	1.136	1.947	-2.35177	-0.147801	0.337202	-1.24978
Q944P7	Leucine aminopeptidase 2, chloroplastic GN=LAP2 PE=2 SV=2	5.057	4.421	0.0928496	-0.452711	0.201499	-0.179931	1.869	1.173	-0.272606	-2.23996	0.373761	-1.25628
O04151	Calreticulin-1 GN=CRT1 PE=1 SV=1	4.283	4.442	-0.487588	-0.438936	1.47627	-0.463262	1.622	1.398	-0.973223	-1.63177	0.802344	-1.3025
Q9ZSK4	Actin-depolymerizing factor 3 GN=ADF3 PE=1 SV=1	3.894	3.907	-0.779307	-0.78988	2.3676	-0.784593	1.623	1.354	-0.970386	-1.7507	0.750092	-1.36055
Q9ASS6	Photosynthetic NDH subunit of lumenal location 5, chloroplastic GN=PNSL5 PE=1 SV=1	3.901	5.873	-0.774058	0.499758	0.062997	-0.13715	1.309	1.68	-1.86105	-0.869513	0.654142	-1.36528
O48676	UDP-glycosyltransferase 74B1 GN=UGT74B1 PE=1 SV=1	6.787	6.966	1.39021	1.21673	1.37365	1.30347	1.472	1.501	-1.3987	-1.35336	1.97932	-1.37603
Q42522	Glutamate-1-semialdehyde 2,1-aminomutase 2, chloroplastic GN=GSA2 PE=2 SV=2	4.048	3.665	-0.663819	-0.948625	0.953513	-0.806222	0.908	2.09	-2.99849	0.238734	0.25918	-1.37988
Q9SKP6	Triosephosphate isomerase, chloroplastic GN=TIM PE=1 SV=1	4.103	3.845	-0.622574	-0.83055	1.04335	-0.726562	1.548	1.359	-1.18312	-1.73719	0.92312	-1.46016
Q96266	Glutathione S-transferase F8, chloroplastic GN=GSTF8 PE=1 SV=3	5.021	4.553	0.0658524	-0.366123	0.212332	-0.150135	1.511	1.356	-1.28808	-1.7453	1.02117	-1.51669
Q9SUR0	AT4G23670 protein GN=F9D16.140 PE=2 SV=1	3.371	3.931	-1.17151	-0.774137	0.891913	-0.972826	1.437	1.412	-1.49798	-1.59393	1.70443	-1.54595
P49688	40S ribosomal protein S2-3 GN=RPS2C PE=1 SV=2	5.552	4.324	0.46406	-0.516341	0.0149852	-0.0261404	1.384	1.438	-1.64831	-1.52365	1.60194	-1.58598
P51427	40S ribosomal protein S5-2 GN=RPS5B PE=1 SV=2	4.132	4.725	-0.600826	-0.253296	0.609052	-0.427061	1.327	1.477	-1.80999	-1.41823	1.11418	-1.61411
P38418	Lipoxygenase 2, chloroplastic GN=LOX2 PE=1 SV=1	4.319	4.465	-0.460591	-0.423849	1.57787	-0.44222	1.383	1.418	-1.65115	-1.57771	1.83932	-1.61443
F4JJ94	14-3-3-like protein GF14 chi GN=GRF1 PE=1 SV=1	4.215	3.616	-0.538583	-0.980767	0.744008	-0.759675	1.353	1.432	-1.73624	-1.53987	1.41891	-1.63806
P0DKC4	Phosphoglycolate phosphatase 1B, chloroplastic GN=PGLP1B PE=1 SV=1	4.095	4.086	-0.628573	-0.672461	1.66823	-0.650517	1.369	1.406	-1.69086	-1.61015	1.80791	-1.6505
B9DHA3	AT3G18780 protein GN=At3g18780 PE=2 SV=1	11.636	12.448	5.02657	4.81276	1.85913	4.91967	1.307	1.354	-1.86672	-1.7507	1.69014	-1.80871
P25697	Phosphoribulokinase, chloroplastic GN=At1g32060 PE=2 SV=1	5.98	2.249	0.785025	-1.87748	0.123711	-0.546227	0.806	1.86	-3.28781	-0.382965	0.370408	-1.83539
Q38970	Acetyl-CoA carboxylase 1 GN=ACC1 PE=1 SV=1	2.271	1.847	-1.99643	-2.14118	1.65242	-2.0688	1.11	1.532	-2.42551	-1.26956	0.714404	-1.84754
Q05758	Ketol-acid reductoisomerase, chloroplastic GN=At3g58610 PE=2 SV=2	3.093	4.08	-1.37999	-0.676397	0.678047	-1.02819	1.506	1.059	-1.30226	-2.5481	0.700667	-1.92518
Q9LLC1	Biotin carboxyl carrier protein of acetyl-CoA carboxylase 2, chloroplastic GN=BCCP2 PE=2 SV=1	2.536	2.788	-1.7977	-1.52391	1.28104	-1.6608	1.215	1.35	-2.12768	-1.76152	1.22358	-1.9446
Q42533	Biotin carboxyl carrier protein of acetyl-CoA carboxylase 1, chloroplastic GN=BCCP1 PE=1 SV=2	1.548	2.317	-2.53862	-1.83287	0.991833	-2.18575	1.437	1.06	-1.49798	-2.5454	0.792185	-2.02169
P56794	50S ribosomal protein L20, chloroplastic GN=rpl20 PE=3 SV=1	4.234	4.544	-0.524334	-0.372027	0.970011	-0.448181	1.196	1.301	-2.18158	-1.89397	1.34822	-2.03777
Q9FG67	Methylthioalkylmalate synthase 1, chloroplastic GN=MAM1 PE=1 SV=1	3.987	5.208	-0.709564	0.0635374	0.254259	-0.323014	1.178	1.183	-2.23263	-2.21292	2.54942	-2.22278
Q9LXU4	Putative uncharacterized protein At5g12950/T24H18_120 GN=T24H18_120 PE=2 SV=1	3.857	4.766	-0.807054	-0.226402	0.486935	-0.516728	1.307	1.04	-1.86672	-2.59946	0.98496	-2.23309
Q9SSK5	MLP-like protein 43 GN=MLP43 PE=1 SV=1	4.752	6.571	-0.135876	0.957625	0.229347	0.410874	1.387	0.853	-1.6398	-3.10493	0.719721	-2.37237
Q42523	Methylcrotonoyl-CoA carboxylase subunit alpha, mitochondrial GN=MCCA PE=1 SV=2	1.854	1.493	-2.30914	-2.37339	2.05876	-2.34127	1.033	1.183	-2.64393	-2.21292	1.24913	-2.42843
Q9MAP3	50S ribosomal protein L11, chloroplastic GN=RPL11 PE=2 SV=1	5.828	6.197	0.671038	0.712292	1.7217	0.691665	1.094	0.946	-2.4709	-2.85355	1.34034	-2.66222
P46422	Glutathione S-transferase F2 GN=GSTF2 PE=1 SV=3	4.74	5.388	-0.144875	0.181612	0.0321402	0.0183684	0.859	1.077	-3.13748	-2.49945	1.14417	-2.81846
O48917	UDP-sulfoquinovose synthase, chloroplastic GN=SQD1 PE=1 SV=1	3.041	3.02	-1.41899	-1.37173	1.96736	-1.39536	0.96	0.864	-2.85099	-3.0752	1.61846	-2.96309
